# Supplementary material for: An Integrative Workflow to Prioritize Toxicity Initiation Events From Air-liquid-interface Exposure of Human Lung Cells to Combustion Aerosols: First Application to Emissions From a Heavy Fuel Oil or Diesel Fuel Operated Ship Engine
Source: Research Square preprint supplement (doi:10.21203/rs.3.rs-152521/v1), 2021-01-25
Supplement: Supplementary file 1 [file 9e4c4b951222577372598d11.xlsx]

## Sheet: HFO_node
name	BetweennessCentrality	ClosenessCentrality	ClusteringCoefficient	Degree	logFC	ChemImpact
ABCB1	0.00119279	0.365992	0	7	0.22197	8.93191
ABCB11	0.02482	0.289385	0	2	-0.141059	0.391667
ABCB6	0	0.346875	1	2	-0.28123	4.40556e-05
ABCC1	5.8168	0.360892	0	7	0.0600933	8.68119
ABCC4	0.05206	0.350632	0	2	0.148061	8.68119
ABCG2	1.4139	0.375	0	3	-0.0925529	8.68324
ABL1	0.00388416	0.416176	0.159159	39	0.251105	0.125
ACE	0.00129494	0.382759	0.2	6	0.118595	-8.40272
ACHE	1.2313	0.359223	0.5	6	0.132235	-0.124956
ACLY	4.6314	0.37302	0.107143	10	0.040262	0.043375
ACO1	4.1026	0.350632	0.0476191	7	-0.157757	7.03049
ACO2	0.00120643	0.357406	0.214286	8	-0.0757641	-0.067375
ACTA2	9.6704	0.395621	0.2	10	-0.0122117	8.68119
ACTB	0.00764001	0.435294	0.159864	51	-0.256302	-4.43177
ACTL6A	3.2885	0.375725	0.217949	13	0.0892867	-4.43182
ADCY5	2.3696	0.32868	0.166667	6	-0.1417	-0.139423
ADIPOQ	0	0.339746	0	3	-0.0861269	-8.68119
ADM	1.3794	0.301982	0.166667	6	1.44661	-0.352885
ADRB2	0.00471329	0.389865	0.0725806	34	0.686074	0.0583333
AFP	1.3941	0.346875	0	3	0.000143144	-8.17902
AGER	9.46e-05	0.383325	0.4	5	-0.109728	8.68119
AGR2	0.02041	0.370353	0.5	4	-0.222693	4.40556e-05
AGT	0.09697	0.37958	0.333333	6	-0.0378379	8.68119
AHR	0.0100777	0.418868	0.142857	24	0.415203	8.75631
AIF1	0	0.339746	0	1	0.134852	8.68119
AK3	0.04666	0.306993	0	2	-0.321371	-0.0583333
AKR1C1	0.2904	0.34672	0	7	1.09111	0.0112658
AKT1	0.0107734	0.438983	0.124009	68	0.270769	0.0857625
AKT2	5.6149	0.388694	0.307692	15	0.515625	-0.0248958
ALAD	1.9622	0.313559	0	6	0.0408148	-0.0326736
ALB	0.0173568	0.430471	0.0883191	27	-0.105363	9.4327
ALDH1A1	9.5e-06	0.325105	0.333333	5	0.0205812	-0.0456
ALDH1A3	0	0.328819	0	1	0.00361225	4.40556e-05
ALDH2	3.3765	0.355769	0.214286	10	-0.0131724	-0.0456
ALDOA	0.00134184	0.400309	0.252964	25	-0.0154226	4.40556e-05
ANP32A	5.0828	0.369297	0.0833333	9	0.445187	4.40556e-05
ANXA1	5.2242	0.404056	0.264706	17	0.374262	8.68119
ANXA3	5.04e-06	0.34672	0	2	0.289707	4.43182
ANXA5	0.0012604	0.412639	0.222222	10	0.333625	8.68124
ANXA6	5.2948	0.370706	0.142857	7	-0.0211877	8.68119
AOC1	0	0.291667	0	1	0.208031	0.0248958
APCS	4.5462	0.368072	0.3	7	-0.0520276	8.68119
APOA1	0.00350464	0.400722	0.130719	20	-0.238206	-0.0583774
APOA4	0	0.352221	1	4	-0.0435654	-8.68119
APOB	1.9922	0.356913	0.25	10	-0.12142	0.043375
APOE	4.6988	0.36039	0.178571	10	0.380315	-0.0456
APP	0.0689775	0.47963	0.0439225	134	-0.294317	1.31653
AR	0.00934677	0.43505	0.157627	62	-0.371979	-0.0261129
ARC	0	0.28081	0	1	1.92718	-300.714
ARG1	2.1091	0.359057	0.4	6	-0.110999	4.40556e-05
ARHGDIA	0.00132122	0.396024	0.209486	25	0.182437	4.40556e-05
ATF3	5.2151	0.381256	0.325	18	0.642929	0.0704958
ATF4	0.00137836	0.406381	0.20915	20	-0.0186928	8.72679
ATM	0.00457417	0.410243	0.170115	32	-0.446843	4.40556e-05
ATP6	0	0.28081	0	1	0.867421	300.714
ATP7A	0.05151	0.32429	0.333333	4	-0.340769	0.0248958
ATP7B	2.8063	0.317791	0	6	0.18194	0.238357
ATP8	0	0.28081	0	1	0.273012	300.714
ATP8B1	0	0.267286	0	1	0.209515	-0.391667
AURKA	0.00343427	0.417742	0.184874	37	0.234468	-4.40556e-05
AURKB	0.00122655	0.405532	0.236842	22	0.0558191	-4.40556e-05
AVPR1A	0	0.267286	0	1	-0.155893	-0.391667
BACE1	1.2654	0.338857	0.166667	6	-0.395636	0.00777778
BAD	2.7217	0.381818	0.352381	15	0.263541	0.0190226
BAX	0.0023942	0.411765	0.207977	29	0.205663	284.275
BBC3	1.5156	0.365132	0.466667	6	-0.224511	4.40556e-05
BBOX1	0	0.269511	0	3	-0.802353	-0.043375
BCL2	0.00793019	0.457597	0.183838	48	-0.149979	8.56753
BCL2A1	8.2828	0.362069	0.194444	9	0.154298	0.336806
BCL2L1	0.00206119	0.408947	0.199507	31	0.559953	-0.238859
BCL2L11	4.7372	0.372305	0.208791	16	0.631174	0.0190667
BCL6	0.00115819	0.377001	0.282051	15	0.118091	0.336806
BGLAP	0.03534	0.28306	0	2	-0.0567472	0.213462
BID	0.00100719	0.399897	0.289474	22	0.519452	8.68119
BIRC2	5.3566	0.370176	0.247368	22	-0.0639872	0.0456
BIRC3	0.00171534	0.386183	0.294118	20	0.697961	0.324072
BIRC5	3.3683	0.384653	0.247619	17	-0.177523	0.00195594
BMP8B	0	0.284824	0	3	-0.133515	-0.336806
BPIFA1	0	0.346566	1	2	0.0671388	8.68119
BTG1	0.09264	0.320809	0	3	0.0759352	0.336806
BUB3	0.05506	0.382947	0.464286	8	-0.590407	4.40556e-05
C3	1.6829	0.376271	0.266667	8	0.0721507	8.68119
CA1	0	0.285767	0	1	-0.479435	-0.00777778
CA2	0.02418	0.32702	0	3	0.688203	-0.00777778
CA3	0	0.328819	0	1	0.0169202	4.40556e-05
CACYBP	1.4463	0.377735	0.222222	11	0.765148	4.40556e-05
CADM1	0.03713	0.306872	0	5	0.138665	-0.000304333
CALCA	0	0.267746	0	1	-0.299064	0.352885
CALR	0.00364179	0.394216	0.0978261	26	-0.155303	1.24821
CAMK2A	9.7115	0.362745	0.0916667	18	-0.218797	-300.714
CAPN1	0.00292417	0.413518	0.130435	23	0.357712	8.68119
CAPN2	0.00105302	0.390452	0.151515	12	-0.100346	8.68119
CAR3	0.06294	0.310056	0	4	0.0169202	-0.391667
CARMIL3	0	0.284824	0	2	-0.131604	0.336806
CASP12	0.02101	0.328959	0.333333	5	0.222322	0.004975
CASP3	0.0194092	0.481115	0.14761	60	0.231469	310.013
CASP6	1.0654	0.376636	0.409091	14	-0.207658	0.0456
CASP7	0.00175822	0.406593	0.22792	29	-0.179068	4.64585
CASP8	0.00628974	0.441728	0.181818	46	-0.300353	309.437
CASP9	0.00158076	0.390452	0.226667	27	-0.0350597	301.286
CASR	8.89e-05	0.291886	0	4	0.0360576	0.516299
CAT	0.00909643	0.452007	0.12987	24	-0.336412	-26.1765
CAV1	0.0097948	0.431667	0.13506	49	-0.114269	4.40556e-05
CBR1	1.3843	0.359556	0.333333	4	0.270683	4.40556e-05
CBS	0.01531	0.297132	0	4	-0.351938	-283.569
CCL1	0.07449	0.374097	0	2	0.125131	8.68124
CCL11	0.09872	0.284928	0	5	0.0141045	283.871
CCL17	0	0.355932	1	4	-0.0626582	8.68119
CCL18	0	0.374097	1	2	-0.133786	8.68119
CCL2	9.6278	0.372841	0.190476	9	1.01461	292.494
CCL20	0	0.339746	0	1	0.561065	8.68119
CCL3	4.9963	0.35823	0.2	8	-0.161914	292.716
CCL4	1.6088	0.362915	0.5	6	-0.10948	-8.68119
CCL5	0.00286924	0.409163	0.142857	17	0.00792102	8.8503
CCL7	0.00123949	0.360892	0.190476	9	-0.211431	8.68119
CCNA2	0.00159447	0.399486	0.25731	21	-0.0324269	-0.200044
CCNB1	0.00155602	0.38676	0.212308	26	0.0939164	0.15
CCND1	0.00461524	0.450174	0.307527	33	0.334263	-274.764
CCND2	0.02558	0.348274	0.266667	6	0.0671203	-0.0190667
CCNE1	0.07021	0.382759	0.488889	10	0.310579	-4.40556e-05
CCR2	1.8452	0.302806	0	4	-0.490116	0.125
CCS	0.09688	0.317143	0.5	6	-0.268631	0.0248958
CCT6A	7.1737	0.41046	0.301471	17	-0.0764275	8.68119
CCT7	6.3326	0.398257	0.245614	19	-0.0405271	-0.0583333
CD1B	0	0.278195	0	1	-0.0206516	0.15
CD274	5.64e-05	0.317402	0	3	0.185725	0.163415
CD36	6.9859	0.356913	0.285714	8	-0.0126023	-0.391667
CD40	0.00146618	0.380323	0.121212	14	0.420857	8.68119
CD40LG	2.2145	0.384653	0.333333	8	-0.226861	8.68119
CD44	0.00176614	0.395018	0.219048	17	0.237898	8.68119
CD68	2.3525	0.361059	0.166667	4	-0.129174	8.68119
CD80	4.4894	0.345641	0.333333	5	0.0315948	8.68119
CD83	0	0.339746	0	1	0.737189	8.68119
CD86	4.7515	0.3885	0.2	7	1.27319	8.84465
CDC34	1.64e-05	0.34703	0.4	8	0.432444	-0.0456
CDCP2	0	0.284824	0	1	0.0739716	0.336806
CDH1	0.00199011	0.432869	0.187692	28	0.0976903	-8.68124
CDH2	3.4725	0.37177	0.333333	6	-0.384416	8.68119
CDK1	0.00807677	0.454652	0.167347	52	-0.124617	8.83124
CDK2	0.0126821	0.432869	0.105278	86	-0.375466	0.15
CDK5R1	3.9824	0.372841	0.142857	10	0.199141	-0.352885
CDKN1A	0.0121628	0.474359	0.198463	56	0.459558	9.60831
CDKN2A	0.00164576	0.406806	0.230108	31	0.340369	300.689
CDX2	0.01726	0.376453	0.4	7	-0.118468	-8.68119
CELSR2	3.92e-05	0.314448	0	3	-0.244366	-0.000304333
CFH	7.0991	0.361564	0.190476	7	0.219633	8.68119
CHRM3	3.6851	0.34214	0	2	0.100545	8.68119
CIAPIN1	6.59e-06	0.296113	0	4	0.399188	4.43182
CKM	0	0.339746	0	3	-0.0977017	8.68119
CLCA1	0	0.339746	0	1	0.152018	8.68119
CLCN4	0	0.284824	0	1	0.114536	-0.336806
CLDN1	4.2477	0.353825	0.333333	6	0.299978	-8.68119
CLDN17	0	0.266005	0	1	-0.125676	-0.000304333
CLEC4A	0	0.283784	0	1	0.163433	-0.163415
CLSPN	0.02463	0.354957	0.4	5	-0.972496	4.40556e-05
CLU	0.00499267	0.42091	0.108696	26	0.595325	-8.68119
CNN2	2.6893	0.344873	0.3	5	-0.612524	4.43182
COL1A1	5.1667	0.357077	0.269231	15	-0.113091	0.125
COL1A2	9.8453	0.370353	0.287879	12	-0.261418	0.213462
COL2A1	7.2932	0.357406	0.138889	11	-0.336236	-0.000304333
COL4A1	2.1506	0.362407	0.380952	9	-0.154404	-0.125
COL4A6	1.6765	0.362576	0.166667	4	0.103829	-0.000304333
COPS8	1.2355	0.379209	0.190476	9	0.502314	4.40556e-05
COX1	0.06323	0.315854	0.166667	4		300.714
COX4I1	2.3349	0.340193	0.1	5	0.261022	300.714
CP	2.5125	0.331343	0.0666667	6	0.1029	0.0326736
CRK	0.00212839	0.398462	0.162879	33	0.188745	-4.43182
CRP	0.00174358	0.391436	0.166667	14	0.259753	725.835
CRYL1	0	0.267286	0	1	0.107352	-0.391667
CSF2	3.1909	0.350316	0	7	0.607393	288.755
CSF3	0	0.339746	0	1	1.40917	8.68119
CST1	0	0.245886	0	1	0.0292998	0.414706
CTH	4.8195	0.330498	0	7	0.266064	0.638979
CTNNB1	0.0120867	0.458407	0.142657	66	-0.240601	-8.28271
CTSB	0.00300434	0.382382	0.194444	11	-0.0118423	4.40556e-05
CTTN	0.00153292	0.403217	0.15	18	-0.252618	-8.68119
CUX1	0	0.264196	0	1	-0.428228	2.38636
CWC22	0	0.291667	0	1	0.0107065	0.0248958
CXCL1	0.02062	0.367029	0.333333	5	1.18282	8.68119
CXCL10	2.8265	0.341839	0	4	-0.0416481	-8.68119
CXCL2	1.7709	0.352381	0.166667	6	1.32714	296.984
CXCL5	0	0.347185	1	2	-0.18546	8.68119
CXCL8	0.0140976	0.463327	0.0398551	27	1.92854	300.781
CXCR4	0.00218196	0.375362	0.111111	11	0.717624	0.33685
CXCR5	2.8568	0.349528	0.3	7	0.11341	4.40556e-05
CYBB	2.3396	0.364447	0.2	5	0.254102	8.68119
CYP11A1	0	0.339746	0	1	-0.225444	8.68119
CYP17A1	1.3742	0.354471	0.333333	3	0.0412571	-8.68119
CYP1A1	0.00313907	0.391633	0	14	1.01035	-292.001
CYP1A2	0.00931141	0.346875	0	15	-0.0772738	-300.806
CYP1B1	0.00403182	0.399897	0	11	0.319433	8.3791
CYP2A6	0.1042	0.331768	0	2		1.24826
CYP2C9	0	0.339746	0	1	-0.0200449	8.68119
CYP2E1	3.5789	0.324833	0	4	-0.0176513	-432.99
CYP4B1	0	0.246745	0	1	0.0365315	0.00274
CYP4F3	0.01578	0.284407	0	2	-0.117303	0.35
DAXX	0.00232969	0.389279	0.133903	29	0.0930978	1.29159
DDAH1	0	0.287778	1	2	0.171187	-0.302174
DDAH2	4.1801	0.352861	0.266667	6	-0.080565	-0.302174
DDB2	3.2081	0.382947	0.2	17	-0.243675	4.40556e-05
DDIT3	0.5648	0.360724	0.197802	16	0.479157	0.496774
DDX39B	6.9471	0.385991	0.25	10	0.0635307	8.68119
DEFB4	1.3e-05	0.347962	0	2	-0.132052	8.63559
DENND5A	0.09482	0.321606	0	2	0.235708	0.336806
DHFR	2.3954	0.377551	0.2	8	-0.185897	4.40556e-05
DNAJB11	0.00111475	0.375	0.242424	12	-0.0910854	-0.391667
DNAJB9	5.6457	0.34672	0.0666667	6	0.558855	0.336806
DNAJC7	2.2238	0.403636	0.436364	13	-0.0787507	8.68119
DNM1L	2.6812	0.374819	0.107143	10	-0.0593085	8.68119
DNMT1	0.00606567	0.429045	0.259259	30	-0.027434	-8.99192
DNMT3A	5.6263	0.361227	0.439394	12	-0.389392	-0.701618
DNMT3B	4.2376	0.376636	0.555556	10	-0.268933	8.37902
DPP4	3.6351	0.316626	0.133333	8	-0.016604	-0.15
DPT	1.1952	0.313433	0	2	-0.0685989	0.336806
DRD2	0.06729	0.295325	0	5	-0.104164	283.871
DSC1	1.1652	0.369824	0	4	0.173369	-8.68119
DTNA	3.5185	0.32028	0.333333	3	0.106972	0.414706
DYNC1I2	0	0.353182	1	2	0.052054	-8.68119
E2F2	0.04335	0.330779	0.5	4	-0.562785	-283.871
EDN1	8.8855	0.360724	0.142857	9	0.202916	309.441
EDN3	2.07e-06	0.341839	0.666667	3	-0.102194	8.68119
EDNRA	5.2093	0.359556	0.133333	6	-0.299719	8.68119
EDNRB	8.7e-05	0.359223	0.4	5	0.00743851	8.68119
EEF2	0.00324689	0.436272	0.25641	29	-0.0428397	4.24942
EGF	1.9082	0.373917	0.266667	8	-0.119963	8.68119
EGFR	0.0262503	0.456254	0.0998468	91	0.276313	0.105933
EGR1	0.2784	0.396024	0.384615	13	1.09924	0.110241
EGR3	0	0.284824	0	1	0.689946	0.336806
EHHADH	0.02036	0.369297	0.333333	4	-0.285396	4.40556e-05
EHMT2	4.1524	0.375907	0.352381	17	0.0189541	-0.163415
EIF2A	0.09815	0.350158	0.133333	6	-0.205747	0.024
EIF2S2	1.6447	0.381631	0.277778	9	0.290424	4.43182
EIF4H	1.8724	0.349213	0.333333	9	-0.174107	4.43182
EIF5	6.5114	0.39542	0.288889	10	0.215247	8.68119
EIF5A	3.52e-05	0.352381	0.1	5	-0.0322785	-4.43182
ELOVL6	0	0.284824	0	1	-0.0541964	0.336806
ENO1	0.00176473	0.412639	0.23545	28	0.00861683	4.43186
ENO2	7.5459	0.357406	0.228571	17	-0.108253	-0.043375
ENPP7	0	0.30093	0	1	-0.0496111	-0.0583333
ENTPD1	0	0.284824	0	1	-0.126751	0.336806
EPHX1	0.03247	0.333476	0	2	0.222607	4.40556e-05
ERBB2	0.00200442	0.378102	0.217391	25	-0.3973	-0.000304333
ERCC1	0.02988	0.357735	0.666667	3	0.131961	4.40556e-05
ERCC5	0.05878	0.357735	0.2	5	-0.341463	4.40556e-05
ESR1	0.0278834	0.463604	0.0988231	110	0.0655866	0.0185012
ETFB	0.03859	0.360056	0.333333	3	-0.25143	4.40556e-05
ETS1	7.3662	0.392028	0.301471	19	0.278387	0.000304333
ETV4	0.07006	0.3489	0.333333	3	0.423263	2.38636
EVI2A	1.4743	0.338857	0	2	0.2657	0.336806
EZH2	0.00289987	0.395018	0.221591	35	-0.31478	0.391667
F12	0.0014269	0.385035	0.0952381	9	0.274371	8.68119
F2	6.2272	0.349213	0.133333	12	0.0372945	-1.24821
F3	3.3189	0.357406	0.2	7	0.87708	8.70809
F7	0.02605	0.354795	0.666667	5	-0.061465	8.68119
F8	7.1134	0.373917	0.133333	6	0.109653	9.03408
FABP3	0.4472	0.313939	0.166667	4	-0.117165	0.414706
FAM106A	0	0.245886	0	1	-0.087729	0.414706
FAM21C	0	0.284824	0	2	0.411038	-0.336806
FANCD2	2.1023	0.352541	0.111111	9	-0.588202	0.125
FAS	0.00122706	0.407874	0.268116	26	0.459744	0.258377
FASLG	5.5626	0.391633	0.342857	15	-0.0255878	0.258377
FASN	9.1474	0.380137	0.186813	16	-0.0407304	-0.391667
FBN1	1.2372	0.305305	0	3	-0.260559	0.0248958
FCAR	0	0.328819	0	3	-0.050786	4.40556e-05
FECH	0.09903	0.316755	0	6	-0.304992	-0.0248958
FEZ2	5.02e-05	0.299653	0	2	0.205619	-0.336806
FGA	4.4046	0.383893	0.416667	11	0.203269	8.68119
FGF23	0	0.245886	0	1	-0.0658709	0.414706
FGF9	0.07449	0.374097	0	4	0.209162	8.68124
FH	7.9722	0.342744	0.155556	10	0.0687818	-0.043375
FILIP1L	0	0.284824	0	1	0.420209	0.336806
FIS1	0.01015	0.355769	0.5	6	0.153866	8.68119
FKBP1A	9.4273	0.358726	0.151515	14	-0.201696	0.15
FKBP5	3.7405	0.36496	0.145455	11	-0.157661	0.15
FLVCR1	0.07798	0.290467	0	2	0.0639348	-0.336806
FN1	0.0409165	0.457328	0.0586667	126	-0.0469863	4.85899
FOS	0.00315768	0.416176	0.156989	33	2.67346	584.628
FOSL1	5.9474	0.377184	0.361111	9	1.11862	8.68119
FREM1	0	0.266005	0	1	-0.210412	-0.000304333
FSHB	0.07728	0.347185	0	4	0.168554	-8.67341
FXYD2	3.5806	0.270543	0	2	0.402391	-0.530385
G6PD	0.2191	0.354471	0.333333	11	0.119416	0.043375
GADD45A	0.00183796	0.397646	0.257895	22	-0.11011	0.336806
GADD45B	0.06019	0.364447	0.361111	9	0.764191	0.0456
GAL	0	0.339746	0	1	0.276086	8.68119
GAPDH	0.00586202	0.438735	0.206633	51	-0.0179506	-0.0455559
GCLC	0	0.269604	1	2	0.49222	-1.24821
GCLM	9.1687	0.333048	0.1	5	0.0570835	-285.119
GFAP	5.6615	0.406381	0.257576	14	-0.30755	8.68119
GGT1	0.02066	0.289385	0	4	-0.198879	283.871
GHR	0.09721	0.354309	0.333333	5	0.209355	8.68119
GHRHR	0	0.245886	0	1	-0.112886	-0.414706
GLO1	0.08254	0.36496	0.333333	9	0.0580981	-4.40556e-05
GLOD4	5.3098	0.3619	0.153846	13	-0.119734	-4.43182
GLRA1	1.0074	0.320942	0	3	0.137287	0.0417708
GLUD1	0.2585	0.366856	0.0666667	8	-0.306132	4.40556e-05
GNRHR	0	0.278195	0	3	0.00532307	-0.15
GOT2	1.4409	0.350949	0.2	6	-0.115103	-0.0583333
GPD1	2.28e-06	0.279095	0.666667	3	0.119921	0.043375
GPX1	0.02104	0.308824	0	5	-0.111345	-0.043375
GRIA1	1.6594	0.370706	0.285714	9	-0.0405851	-300.714
GRIA2	5.9065	0.349842	0.3	5	-0.133895	-300.714
GRIN1	2.1453	0.336218	0.214286	10	-0.0949589	-300.714
GRIN2A	2.2781	0.330217	0.285714	9	-0.184913	-300.714
GRIN2B	2.1928	0.335927	0.190476	9	0.00128778	-300.714
GSR	4.1262	0.368596	0.333333	9	0.248548	275.19
GSS	0.01835	0.290576	0	4	0.167445	-285.119
GSTM1	3.5012	0.345333	0.166667	6	0.12256	-8.68809
GSTM3	0.4264	0.358726	0.166667	6	0.0346698	-4.40556e-05
GSTO1	3.0182	0.385035	0.25	8	0.119802	-4.40556e-05
GSTP1	0.00404412	0.430233	0.191667	18	-0.0514582	8.06101
GUCY1A1	0.01208	0.348118	0.333333	3	-0.269934	0.024
GUCY1B1	1.34e-05	0.341238	0.333333	3	-0.189888	0.024
H2AFX	0.00501801	0.444	0.163848	46	-0.286004	8.68124
HDAC1	0.00969092	0.428571	0.150571	70	-0.0783025	0.0583333
HDAC4	0.6913	0.399076	0.27668	25	0.017895	0.0583333
HERC5	0.00103392	0.376819	0.217949	15	0.0662617	0.336806
HERPUD1	3.2436	0.358891	0.178571	8	0.412529	0.0456
HIF1A	0.00900068	0.457059	0.205051	45	0.281146	-5.97752
HIST2H3A	0.00180946	0.383893	0.0588235	17	-0.237087	-0.336806
HIVEP2	0.04956	0.316239	0	2	0.730335	0.336806
HLA-A	0.02297	0.303279	0	4	0.39257	0.302174
HMBS	0.01598	0.341839	0.666667	3	0.185678	-0.0248958
HMGB1	0.00138201	0.419773	0.249012	23	-0.446143	8.68119
HMOX1	0.00673706	0.431907	0.0727273	13	2.45974	10.242
HNF4A	0.2815	0.376453	0.472527	16	-0.172027	-0.0248958
HNMT	0	0.328819	0	1	-0.228534	4.40556e-05
HNRNPA1	0.0116186	0.441728	0.161125	71	-0.412326	4.40556e-05
HNRNPA2B1	0.00214173	0.416176	0.241935	32	-0.22934	4.40556e-05
HNRNPC	0.00185674	0.398666	0.231579	22	0.18651	-4.43186
HNRNPD	0.00487422	0.420227	0.215385	42	-0.226547	-4.40556e-05
HNRNPH3	1.5432	0.385991	0.560606	14	0.343918	4.43177
HNRNPK	0.00202676	0.415286	0.23545	30	-0.151868	-4.40556e-05
HNRNPL	9.9967	0.398257	0.389474	22	-0.308785	-4.40556e-05
HNRNPLL	3.3522	0.333476	0	7	-0.404824	0.336806
HNRNPR	9.6015	0.405956	0.333333	22	-0.237291	-4.40556e-05
HP	0.2258	0.330217	0.1	5	-0.0425954	0.00777778
HRAS	2.7604	0.371237	0.179487	15	0.144197	300.714
HRG	7.8926	0.388694	0.222222	9	0.0124833	8.76442
HRH3	0	0.278195	0	1	-0.209095	-0.15
HSF1	4.0853	0.374097	0.12381	17	-0.224864	0.0583333
HSPA1A	0.00228321	0.423895	0.191597	35	2.46311	0.00694406
HSPA5	0.0214259	0.47234	0.122611	68	-0.138677	9.26249
HSPA8	0.00857906	0.446552	0.186933	60	0.782857	4.40556e-05
HSPB1	0.00681723	0.432147	0.137255	53	0.679129	-4.40556e-05
HSPD1	0.00525449	0.420227	0.146179	45	0.35986	0.0248958
HTR1A	0.03535	0.298273	0	4	0.240716	0.352885
IBSP	0	0.246902	0	1	-0.160501	0.213462
ICAM1	0.00379346	0.435294	0.12987	24	0.458594	598.244
IER3	0.2339	0.36496	0.238095	7	1.56057	0.00858581
IFIT1	1.9257	0.32702	0.3	5	-0.380364	0.336806
IFIT2	0.2371	0.330217	0.619048	7	-0.412426	0.336806
IFIT3	9.9475	0.360056	0.290909	13	-0.0972971	0.336806
IFNB1	0	0.281114	0	3	0.0126365	0.125
IFNG	6.4908	0.373917	0.2	9	-0.0252357	-8.6166
IFNGR2	2.8259	0.335927	0	4	0.238087	0.336806
IGF1	5.5405	0.329656	0.178571	8	0.139013	-0.00777778
IGF1R	0.00219754	0.403846	0.297101	26	-0.271244	-0.0583333
IGFALS	1.0346	0.288848	0.333333	3	-0.207587	-0.391667
IGFBP3	0.00212669	0.369472	0.161905	15	-0.65576	0.0583333
IGFBP4	3.0688	0.351266	0.333333	4	0.265339	8.68119
IGFBP6	0.09322	0.314066	0.333333	3	0.00156941	0.0248958
IL10	1.6287	0.358726	0	6	-0.0406045	8.62286
IL12B	0	0.340044	1	4	0.041936	-8.68119
IL13	1.6848	0.3579	0.333333	3	0.222061	8.68119
IL16	0.0052696	0.352701	0.0444444	12	0.203339	0.163415
IL17F	0	0.339746	0	3	0.235606	8.68119
IL18	0	0.364447	1	2	0.449463	-8.68119
IL1A	0.1583	0.350316	0.166667	6	0.612897	9.18337
IL1B	0.00160034	0.418868	0.0454546	14	0.990056	-270.331
IL1RN	0.08361	0.365475	0.666667	5	-0.353895	-8.62286
IL2	2.0731	0.358891	0.166667	6	-0.000506625	9.0417
IL23A	8.64e-05	0.34411	0.333333	5	0.0761165	8.68119
IL24	4.0567	0.399486	0.166667	9	0.422044	8.68124
IL2RA	0.01492	0.360892	0.5	6	-0.208216	-8.68119
IL3	0	0.339746	0	3	-0.124542	8.68119
IL36G	0.02697	0.356095	0	2	0.128958	-8.68119
IL4	2.6778	0.345487	0	4	-0.118152	8.69436
IL4R	2.7885	0.329796	0.0357143	8	0.380429	0.15
IL5	0	0.339746	0	3	0.292595	8.68119
IL6	0.00480537	0.387725	0	14	1.86943	1034.97
IL9	0	0.339746	0	1	0.133573	-8.68119
IRF1	1.5413	0.351425	0.25	9	0.749518	2.38636
IRF8	0.08861	0.339598	0.266667	8	0.343336	0.00777778
IRS1	0.00245321	0.403636	0.263333	27	0.23924	-0.0583333
IRS2	2.3543	0.372126	0.418182	11	0.419403	-0.0583333
ITGA2	4.7247	0.33362	0.0476191	9	0.119928	0.000304333
ITGA6	0.06808	0.346411	0.2	5	-0.304808	4.43182
ITGB3	0.00130486	0.400722	0.241667	18	-0.344788	8.63559
ITPR1	1.9393	0.354471	0.138889	9	0.220153	0.125
IVL	0.07626	0.315597	0.666667	6	-0.28477	0.352885
JUN	0.0161748	0.47234	0.177318	59	1.19031	576.034
KAT2B	0.00250976	0.400722	0.219697	35	0.0634554	0.391667
KAT8	6.3034	0.368072	0.355556	12	-0.0224232	0.391667
KCNA10	0	0.226663	0	1	0.182443	-0.1775
KCNA5	0.04073	0.342442	0.142857	9	-0.0887005	0.0456
KCNH1	0	0.226663	0	1	-0.250216	-0.1775
KCNH3	0	0.226663	0	1	0.347158	-0.1775
KCNJ15	0.05493	0.263747	0	2	0.293826	-0.1775
KCNJ2	0.05493	0.265369	0.666667	3	0.23907	-0.1775
KCNJ4	5.2104	0.298044	0.333333	4	-0.0500173	-0.1775
KCNN2	0.02529	0.288419	0	4	-0.0696556	0.352885
KCNN3	1.3729	0.339005	0.333333	3	-0.00479071	0.352885
KDM3A	0.07815	0.342593	0.2	5	0.192274	0.163415
KDM4A	0.08715	0.341238	0.5	6	0.0243905	0.391667
KEAP1	0.00108071	0.390649	0.158333	18	0.272237	0.163371
KHSRP	3.8493	0.378471	0.212121	12	-0.58339	4.43182
KLF4	7.9257	0.389669	0.355556	10	0.980773	-0.336806
KLK1	2.1098	0.289385	0	3	-0.00284951	-0.522971
KLK3	3.4125	0.367029	0.214286	8	-0.0965934	-0.00828148
KLK5	0.5452	0.359057	0.142857	8	0.0292727	-0.0583333
KLK8	3.8624	0.310056	0	3	0.150535	0.508013
KRAS	3.2569	0.373917	0.115385	13	-0.305874	300.669
KRT1	0.00199474	0.379951	0.198529	17	0.0380513	0.352885
KRT10	6.5331	0.409594	0.269231	13	0.304191	-8.68119
KRT18	0.0019855	0.398462	0.229437	24	0.0547444	-4.82348
KRT19	4.3e-05	0.375	0.133333	8	0.14398	4.40556e-05
KRT8	0.2317	0.404477	0.352941	17	0.166606	4.40556e-05
KRT9	1.1281	0.366682	0.377778	10	0.183441	4.43182
LASP1	3.8144	0.348274	0.321429	8	-0.0638308	4.43182
LATS2	2.0894	0.366856	0.218182	13	0.4741	-0.0248958
LCAT	0.03361	0.309932	0	3	0.181108	-0.0248958
LEP	8.82e-05	0.354471	0.5	4	0.146695	-8.68897
LGALS1	0.00168941	0.383514	0.163399	20	0.0102208	0.00858581
LGALS3	0.00491921	0.405109	0.105072	26	-0.173223	4.40556e-05
LGR5	0	0.267286	0	1	0.0841838	-0.391667
LHB	0.07728	0.347185	0	2	0.28825	8.68897
LIG3	1.0639	0.361395	0.238095	7	0.102167	-1.24821
LMNA	0.00514518	0.444508	0.182186	41	-0.175471	13.113
LMNB1	5.8218	0.395823	0.258333	18	-0.496873	-4.40556e-05
LMNB2	0.08968	0.367376	0.533333	8	-0.226162	8.68119
LOR	0.05092	0.307967	0.5	6	0.32049	0.352885
LSS	0.02482	0.289385	0	2	-0.278368	-0.391667
MAP3K1	0.5348	0.390845	0.296703	16	0.236207	4.40556e-05
MAP3K8	3.1459	0.353825	0.238095	7	1.03117	0.336806
MAP4	0.00185504	0.365647	0.266667	10	-0.336452	0.414706
MAPK1	0.0110367	0.465269	0.155245	68	0.0837019	9.11619
MAPK3	0.00971691	0.452797	0.155142	50	0.108812	9.11619
MAPK8	0.00382464	0.433352	0.216471	53	0.223532	4.40556e-05
MBD2	0.04647	0.350316	0.4	7	0.388881	0.302174
MCAM	1.8185	0.286188	0	2	-0.256683	0.414706
MCM7	6.6859	0.407019	0.216667	18	-0.299917	4.40556e-05
MCU	1.2423	0.325786	0	4	0.138094	-0.00777778
MDM2	0.0120043	0.44324	0.147596	67	-0.607793	0.302218
MDM4	1.8089	0.389474	0.428571	16	-0.788667	-0.163415
MECP2	2.9225	0.360557	0.242424	12	-0.191114	-0.00777778
MFN2	0	0.339746	0	3	-0.123762	8.68119
MGMT	3.6401	0.381256	0.245614	21	0.171062	0.0583333
MIF	3.2634	0.396024	0.285714	9	0.0628454	8.68119
MKI67	0.06064	0.352541	0.214286	10	-0.559946	0.002
MME	0.00133763	0.355281	0.0879121	16	-0.471271	-0.00777778
MMP1	0.00259712	0.395018	0.0727273	13	0.746396	13.4152
MMP13	0.2377	0.311923	0.2	7	0.0494653	0.15
MMP14	0.00228938	0.336655	0.138889	9	-0.0584792	0.1991
MMP2	0.00158017	0.346875	0.0769231	16	-0.0100613	0.139719
MMP9	0.00280333	0.421138	0.205882	19	0.0483782	9.01525
MPO	4.5864	0.349685	0	5	-0.0613853	8.72457
MRC1	0	0.339746	0	1	-0.190795	8.68119
MSH6	0.2701	0.37884	0.327273	11	-0.129671	-4.40556e-05
MSRA	0	0.283784	0	1	-0.16301	-0.163415
MSRB3	8.22e-06	0.315213	0	2	-0.0815594	-0.163415
MT2A	0	0.283784	0	1	0.112743	0.163415
MT3	0.02283	0.319359	0	2	0.409451	0.0583333
MTF1	0	0.30093	0	1	0.174586	0.0583333
MUC4	4.95e-05	0.347185	0	2	0.215033	8.68119
MUC5AC	1.3e-05	0.347962	0	2	0.277057	8.72679
MVP	2.6745	0.365819	0.238095	9	-0.168934	-4.43182
MXD1	7.5047	0.370353	0.194444	11	0.430037	0.336806
MYC	0.00958684	0.431907	0.136721	60	1.64353	300.714
MYDGF	6.02e-06	0.319622	0	2	0.0951574	4.43182
MYH11	0.07635	0.359889	0.238095	7	-0.596165	-4.40556e-05
MYL6	0.8634	0.386183	0.145455	11	-0.0910596	4.40556e-05
MYLK	5.2301	0.367029	0.285714	7	-0.285063	0.35258
MYOG	4.89e-06	0.353182	0.666667	5	0.316028	-4.40556e-05
NAMPT	0.00112459	0.35	0.0714286	8	0.327325	-0.336806
NBR1	0.07175	0.369824	0.333333	6	-0.244167	13.113
NCAM1	0.02013	0.323885	0	4	-0.12939	-0.00777778
NCF1	8.3523	0.380323	0.179487	15	1.05664	4.40556e-05
NCF2	6.4375	0.344262	0.107143	8	-0.134065	0.336806
NCOA2	3.6708	0.390845	0.360294	19	-0.0816318	-4.40556e-05
NDC80	5.5603	0.361059	0.109091	13	-0.401744	-0.00858581
NDRG1	0.00140633	0.373378	0.068421	20	0.256342	2.57378
NDUFV1	0.1294	0.331202	0.142857	7	-0.247185	4.43182
NDUFV2	0.000187	0.3489	0.1	5	0.149313	-0.0583333
NEDD9	0.00104459	0.373378	0.236364	13	0.300884	2.72317
NFAT5	1.2476	0.338857	0.333333	5	0.269229	0.336806
NFE2L1	0.02298	0.339153	0.3	7	-0.395476	-0.0456
NFE2L2	0.00347238	0.446039	0.224638	24	0.481	10.1383
NFIB	1.0176	0.313559	0	2	-0.776382	0.336806
NFKB1	0.00497028	0.443746	0.190691	39	0.268608	8.7273
NFKB2	0.5085	0.377551	0.333333	14	0.440446	8.68119
NFKBIA	0.00302631	0.399691	0.128205	29	0.550468	0.382406
NKX2-5	0.01246	0.365992	0.666667	3	0.236375	-8.68119
NLRP3	0.07132	0.349213	0	2	0.268476	8.68119
NME1	5.2452	0.359556	0.142857	9	0.0663273	4.40556e-05
NOS1	2.7667	0.342291	0.0952381	7	-0.167966	0.0248958
NOS2	0.00645775	0.437008	0.122984	34	-0.042879	593.416
NOS3	0.00300644	0.413518	0.15	18	0.0277237	-8.48546
NOX4	0	0.341839	1	2	-0.0328944	8.68119
NPC1	0	0.328819	0	1	0.500388	-4.40556e-05
NPEPPS	7.69e-06	0.291229	0	2	0.100691	9.43395
NQO1	0.00522461	0.440976	0.12381	17	0.0574923	4.40556e-05
NR1I2	0.06988	0.372841	0.466667	8	0.111507	-4.40556e-05
NR2E3	0.03292	0.359057	0.5	5	-0.159431	-0.15
NR3C1	0.00268941	0.407446	0.225397	38	0.42101	0.0456
NR4A1	0.00474646	0.388694	0.193732	29	0.989407	300.714
NRF1	0.05743	0.35856	0.333333	4	0.07002	-0.00777778
NT5C3A	0.04698	0.290034	0	2	0.242426	0.237462
NUDT9	0.3313	0.344262	0.2	6	-0.00181004	0.177174
ODC1	0.01209	0.295213	0	4	-0.0497704	-0.043375
OGDH	0.01616	0.311423	0	2	-0.109771	-8.68119
OMP	0	0.339746	0	1	0.000425761	-0.336806
OTX1	1.5626	0.288955	0	2	-0.148404	4.40556e-05
P2RX7	0	0.338415	1	2	-0.349062	-0.00858581
PAH	8.33e-06	0.283163	0	4	0.0575224	-0.336806
PAPLN	0	0.284824	0	1	-0.186233	0.344344
PARP1	0.0101171	0.442987	0.171765	53	-0.536648	-4.40556e-05
PCBP2	2.9594	0.387531	0.338235	19	-0.253122	-275.19
PCNA	0.00886024	0.43824	0.154334	46	-0.113832	4.43182
PCNP	8.18e-06	0.328402	0.333333	3	-0.0311892	8.68119
PECAM1	0.03857	0.373558	0.6	7	0.112599	0.336806
PELI1	3.1153	0.33092	0.1	5	0.685342	-0.15
PF4	0	0.32702	1	5	0.102504	4.40556e-05
PFN1	0.08912	0.385226	0.472222	11	0.337338	-4.43182
PHB	0.00120067	0.398462	0.225296	23	0.124569	8.68119
PHGDH	0.00133761	0.412639	0.227273	12	-0.174931	8.68119
PIGR	0	0.346566	1	4	-0.237121	0.043375
PKLR	0.04392	0.323211	0	3	0.112332	-0.0583333
PKM	0.00180137	0.40981	0.182796	33	0.254976	8.68119
PLAUR	6.7526	0.353503	0.2	7	0.998969	-8.68119
PLG	0.00224927	0.401966	0.133333	23	-0.366797	-4.40556e-05
PLK1	0.00434829	0.415064	0.139601	27	0.421462	4.40556e-05
PLS3	5.2544	0.382947	0.2	10	0.145116	0.33685
PMAIP1	8.6822	0.370353	0.380952	7	-0.124009	0.0583333
PML	0.00183702	0.413078	0.252439	43	0.182739	0.320211
PON1	5.7082	0.34335	0.133333	6	0.076972	0.00777778
POU5F1	0.00116448	0.36755	0.0701754	21	0.0562862	-0.0583333
PPA2	0.02715	0.335492	0	2	0.320653	8.73953
PPARA	6.1575	0.392623	0.227273	14	-0.119419	-13.238
PPARG	0.00296274	0.429757	0.236453	31	0.355213	0.0134146
PPBP	3.1428	0.335782	0	7	0.0280641	4.40556e-05
PPIA	0.5615	0.406593	0.281046	20	0.352673	4.40556e-05
PPIB	0.0012457	0.391436	0.191176	17	0.0179442	4.40556e-05
PPM1D	1.17e-06	0.37	0.833333	4	0.945081	4.40556e-05
PRDX1	9.2807	0.403427	0.26087	25	0.02507	-0.302174
PRDX2	0.9226	0.397239	0.238095	24	0.287147	8.68119
PRDX6	0.00197	0.408517	0.171429	23	-0.159699	-8.68119
PRKACA	0.00473731	0.424358	0.125	33	-0.0699672	0.125
PRKCD	0.00433616	0.407019	0.175403	34	0.292051	0.2
PRKDC	0.00470304	0.428099	0.177143	52	-0.35355	-0.115007
PRL	2.0108	0.332905	0	5	0.160121	0.336806
PRNP	1.9052	0.341689	0.5	4	0.167445	4.40556e-05
PRPF31	1.8021	0.357735	0.333333	8	-0.195464	8.68119
PRPF4	9.4871	0.395018	0.2	12	-0.140094	0.414706
PRRC2C	0.00107904	0.3489	0.5	4	-0.157099	-4.40556e-05
PSMA6	0.00175177	0.395823	0.207792	22	-0.0804538	4.40556e-05
PSMB4	3.3464	0.383704	0.318681	14	-0.0833601	4.40556e-05
PSMC2	9.5123	0.380696	0.191176	19	0.242469	4.40556e-05
PSMC4	3.24e-05	0.360892	0.535714	8	0.317572	4.40556e-05
PSME3	3.6417	0.395823	0.258333	18	0.281634	-4.40556e-05
PSME4	5.38e-06	0.336947	0.666667	3	0.242452	301.051
PTGER2	3.6066	0.330076	0	3	0.484771	300.714
PTGER4	9.72e-06	0.313054	0	2	0.254166	4.40556e-05
PTGES2	6.23e-06	0.34937	0.333333	5	0.207619	-0.0456
PTGIS	7.16e-06	0.356422	0.666667	4	-0.152012	310.004
PTGS2	0.00572693	0.449653	0.139706	19	-0.0390293	-0.352885
PTH	0	0.267746	0	3	0.315939	0.1775
PTK2	0.00871059	0.394216	0.280702	21	0.123388	-0.128829
PTPN1	0.00381702	0.400309	0.169231	26	0.0682738	0.00777778
PTPRC	3.5599	0.335782	0.0476191	9	0.347104	8.68119
PTX3	0	0.340193	1	2	1.48518	0.302174
PXN	0.00398515	0.405321	0.131746	38	0.345254	-0.0583333
PYCR2	0.02488	0.368596	0.5	4	-0.153146	-0.336806
RAB11FIP1	0	0.284824	0	3	-0.117697	0.336806
RAB8B	0.000836	0.373917	0.166667	9	-0.0921079	-4.43182
RACK1	0.00317283	0.403217	0.137931	32	0.0527886	-4.40556e-05
RAF1	0.00199464	0.409163	0.219355	33	0.196496	4.40556e-05
RAN	6.7858	0.390845	0.131868	16	0.242797	-4.40556e-05
RANBP1	0.00109883	0.382382	0.222222	9	-0.10565	0.0583333
RARA	0.00197153	0.404898	0.224868	30	0.32059	-0.414706
RARRES1	0	0.245886	0	1	-0.138874	8.68119
RARRES2	0	0.339746	0	1	-0.102378	-575.754
RB1	0.0116183	0.45412	0.175336	61	0.00948898	-0.391667
RDX	4.6936	0.352221	0.155556	10	0.178346	8.8185
RELA	0.0134121	0.463604	0.150962	67	0.113248	0.336806
RELB	6.0533	0.361395	0.254545	13	0.625683	-0.000304333
RELN	2.66e-05	0.309315	0	4	-0.423148	-0.414706
RGS4	5.0705	0.32702	0	3	0.226375	8.68119
RHOA	0.0029035	0.398053	0.185714	23	0.243851	0.00858581
RHOC	1.3137	0.335347	0.1	5	0.216622	8.68119
RNASE3	0	0.339746	0	1	0.165221	0.336806
RNF149	0	0.284824	0	1	0.176183	-0.336806
RP9P	0	0.284824	0	1	2.00243	-4.40556e-05
RPA2	0.00436194	0.429757	0.175758	45	-0.184379	-0.0583333
RPIA	0.04165	0.322943	0	5	0.0319241	-4.40556e-05
RPRD1B	4.0321	0.35823	0.2	6	-0.123082	0.0794
RPS6KB1	3.6496	0.385608	0.257143	17	-0.322679	-4.40556e-05
RUVBL1	4.6641	0.386952	0.294118	20	0.227566	8.68119
RUVBL2	0.00176311	0.434078	0.245014	29	0.0290332	0.302218
S100A6	0.08085	0.381069	0.52381	9	0.078179	8.68119
S100A7	0.6442	0.381069	0.2	7	0.179713	8.28953
S100A8	0.00161568	0.415508	0.333333	12	0.558558	8.68119
S100A9	5.3045	0.37177	0.133333	8	0.461262	0.163415
SATB2	0.02201	0.340044	0.333333	3	0.134354	0.30951
SCGB1A1	2.3034	0.32771	0	3	0.118982	8.68119
SEC14L3	0	0.339746	0	1	0.321214	726.01
SELP	0.3404	0.348743	0	6	-0.321568	-4.40556e-05
SEPTIN9	2.6579	0.39302	0.357143	8	-0.112089	8.68119
SERPINA1C	0	0.339746	0	1	0.297096	8.68119
SERPINE1	1.7483	0.365303	0.266667	8	0.429239	-0.0583333
SERPINH1	6.7056	0.394016	0.198529	17	0.402226	0.336806
SESN2	2.8742	0.348274	0.1	5	0.49027	-4.40556e-05
SF3B4	0.06844	0.351107	0.166667	4	0.586581	8.68119
SFTPA1	4.39e-06	0.34411	0.666667	5	0.0762885	-8.68119
SHANK3	0	0.356259	1	2	-0.2426	-0.000304333
SHC3	1.2844	0.34734	0.5	4	-0.593471	0.391667
SIRT1	0.00368868	0.406806	0.17561	43	0.261144	-8.68119
SIRT3	0.06946	0.366164	0.4	5	-0.348277	1.22332
SLC11A2	0.03947	0.29555	0	2	0.23627	-0.0583333
SLC15A1	0	0.30093	0	1	0.188437	8.72457
SLC2A1	3.5467	0.373199	0.2	5	0.314186	-0.391667
SLC2A3	0	0.267286	0	1	-0.15204	0.0583333
SLC30A1	0.01683	0.317143	0	2	-0.289407	-0.0583333
SLC30A5	0.01237	0.319097	0	2	-0.298753	-0.0248958
SLC31A1	0	0.292105	1	4	-0.332452	0.336806
SLC38A2	0.3808	0.340193	0.333333	4	1.32603	-0.0583333
SLC39A4	0.2407	0.311298	0.333333	3	0.141295	0.391667
SLC39A6	0.02845	0.277302	0	2	-0.0825388	-0.0583333
SLC39A7	0.02472	0.315341	0	2	-0.110209	0.00828148
SLC3A2	0.00117588	0.370706	0.272727	11	0.501765	0.0248958
SLC40A1	0	0.291667	0	1	-0.402002	-0.391667
SLC51A	0	0.267286	0	1	0.0201759	-0.0583333
SLC6A3	3.7737	0.332478	0	7	-0.15738	0.336806
SLC7A11	1.0047	0.299191	0	2	0.391593	0.00828148
SLC7A5	0.03956	0.343046	0.3	5	0.371666	-8.68119
SLCO1B1	0	0.339746	0	1	0.000558431	-8.68119
SLCO1B3	0	0.339746	0	1	0.0315452	-8.68119
SLCO2B1	4.97e-05	0.371415	0	2	0.188651	0.414706
SMC3	0.00346963	0.371237	0.10989	14	0.0537451	8.6815
SNAI1	0.00113656	0.405321	0.252747	14	2.59614	4.40556e-05
SNAP25	1.0468	0.370176	0.333333	4	-0.158728	13.113
SNCA	0.00451374	0.428099	0.177011	32	0.35004	-416.629
SOD1	0.00570915	0.404056	0.132275	30	0.153557	-293.894
SOD2	0.00292067	0.422972	0.191667	18	0.425717	0.414706
SON	7.7971	0.334194	0.0476191	7	-0.293658	8.68119
SOX2	0.00383379	0.405744	0.0984615	28	0.0317326	0.171192
SP1	0.00461801	0.416622	0.217143	52	-0.377566	0.00777778
SP3	2.8279	0.373558	0.533333	10	-0.210525	-0.414706
SPAG11A	0	0.245886	0	1		0.213462
SPARC	4.7377	0.349213	0.309091	13	-0.205318	0.414706
SPIB	0.00142075	0.34472	0.4	8	0.297171	0.338462
SPP1	0.00167674	0.352861	0.0888889	10	-0.00531082	-0.163415
SPRY2	5.5224	0.323346	0	8	0.984718	8.68119
SQSTM1	0.00663896	0.427628	0.133634	39	0.380596	-0.0583333
SRC	0.0129675	0.434807	0.136723	62	0.167273	-0.266667
SREBF1	7.2026	0.366337	0.252747	16	-0.287413	4.40556e-05
SRM	0.08416	0.365992	0.1	7	0.104878	4.43182
SRPK1	0.00246819	0.391436	0.2	17	-0.132967	-0.0583333
SRSF9	1.1083	0.374819	0.238095	7	-0.232211	8.68119
STAR	0	0.353182	1	2	-0.118422	4.40556e-05
STIM1	2.34e-06	0.358726	0.666667	5	0.00067252	4.40556e-05
STOML2	0.03391	0.377551	0.3	5	0.245127	0.336806
STX11	6.4991	0.34843	0.142857	9	0.398396	-0.391667
SUV39H1	0.0018124	0.380696	0.29249	25	0.0868538	0.15
TCRB	0	0.278195	0	1		8.68119
TF	0.00205279	0.393418	0.163636	13	-0.0388409	300.714
TFAM	1.0752	0.358065	0.333333	4	-0.3382	0.0039125
TFF1	0.04747	0.334625	0	6	0.041975	1.04821
TFRC	7.4926	0.386952	0.192308	15	0.352628	8.81246
TGFB1	0.00333465	0.398871	0.0916667	18	0.323034	-8.32831
TGM1	3.7004	0.36496	0.333333	4	0.174003	-8.68119
TGM2	0.00443715	0.436762	0.142529	32	0.294466	0.213462
THBS1	0.00169261	0.362407	0.147619	21	0.428944	0.00858581
TIMP1	0.04357	0.31483	0.166667	4	0.272124	-8.68115
TJP1	0.00441991	0.408732	0.0915033	20	-0.215444	-0.000304333
TLN2	1.1479	0.330638	0	3	0.0445913	-8.68119
TLR2	3.4456	0.369297	0.2	7	0.455885	-8.68119
TLR4	0.2772	0.373558	0.25	8	1.32632	-4.40556e-05
TMPO	0.01068	0.339153	0	2	-0.48342	13.5655
TNF	0.00557189	0.430948	0.126482	25	0.101807	0.395139
TNFAIP3	0.9672	0.379024	0.333333	14	0.352011	-8.68119
TNFRSF11B	2.1321	0.36755	0.166667	4	0.225877	0.0583333
TNFRSF1A	0.00195144	0.393617	0.209195	32	0.340857	726.697
TNFRSF1B	0.00234831	0.381443	0.151515	14	-0.122579	4.40556e-05
TNFSF10	1.9975	0.363254	0.3	7	-0.305349	-0.15
TOP2A	5.7153	0.39542	0.320261	20	0.0688904	595.819
TP53	0.0563032	0.511858	0.100291	131	-0.300358	0.00133239
TPO	0.05756	0.329237	0	2	0.169485	0.414706
TPR	0.00201802	0.36496	0.145455	11	-0.498126	4.40556e-05
TPT1	3.5914	0.398462	0.363636	14	0.285705	-0.0248518
TRAF6	0.00423118	0.415953	0.154839	33	0.489243	4.40556e-05
TRAP1	3.0349	0.398871	0.282051	13	0.174476	4.40556e-05
TREX1	0.02757	0.353664	0.4	5	-0.551944	9.17897
TRPA1	2.6785	0.357241	0	4	-0.154211	64
TST	0	1	0	1	-0.598362	0.0583333
TTC9C	0.02237	0.35	0	3	-0.459115	8.68119
TTR	0.00116236	0.39302	0.218182	13	0.223817	4.40556e-05
TUBA1C	8.4384	0.397239	0.228571	21	0.245539	4.40556e-05
TUFM	1.8525	0.376819	0.222222	9	0.0520603	4.40556e-05
TWIST1	0.08912	0.381443	0.380952	9	0.0160382	-0.0456
TXN	0.00332432	0.401136	0.150246	29	0.180242	0.346067
TXNRD1	6.9518	0.375725	0.194444	9	0.455596	4.40556e-05
UBA52	1.1546	0.351743	0.2	7	-0.072407	-0.163415
UBE2A	3.4586	0.372305	0.309091	13	0.139614	0.163415
UBE2E1	7.01e-05	0.33812	0	7	0.345699	8.68119
UBQLN1	0.00442806	0.415286	0.0883191	29	0.185363	8.68119
UBQLN2	9.2169	0.375544	0.192308	15	-0.293527	-8.68119
UCP1	0	0.340193	1	2	0.0588529	8.68119
UGDH	0.0024127	0.370883	0.0727273	13	0.313082	4.40556e-05
UGT1A1	0.04446	0.340193	0	2		4.40556e-05
UGT1A4	0.04446	0.340193	0	2		0.00832554
UGT1A6	0.02781	0.332051	0	2	0.967726	0.00828148
UGT1A7	0.01679	0.297587	0	2		4.40556e-05
UGT1A9	0.04446	0.340193	0	2		-1.24821
UROD	0.09024	0.328541	0	6	-0.128755	2.38636
USF1	2.7265	0.37106	0.194444	11	-0.0156274	0.336806
USP18	2.1061	0.332905	0	4	-0.0565775	-0.000304333
VAV3	1.4168	0.351425	0.466667	6	-0.19012	4.43182
VBP1	0.08413	0.335492	0.0666667	6	-0.212878	297.228
VCAM1	0.0141821	0.444254	0.0696038	76	0.131693	-3.71329
VEGFA	0.00101558	0.385035	0.0833333	11	0.747496	-0.0248958
VIM	0.00463355	0.419094	0.159159	39	-0.399364	0.00626316
VMP1	6.34e-06	0.305065	0	2	0.0722759	-0.336806
WFDC2	0	0.339746	0	1	0.394314	8.68119
WNT5A	2.4581	0.335782	0	2	-0.310719	0.352929
XBP1	3.9596	0.363424	0.2	8		0.336806
XDH	6.73e-06	0.309069	0	2	0.165323	0.125
XPA	3.2849	0.367029	0.222222	9	-0.56264	0.0583774
YWHAZ	0.00442026	0.422053	0.178049	43	-0.381431	-0.0248958
ZACN	5.3401	0.321606	0.1	5	-0.0696689	-0.0583333
ZC3HAV1	0.000262	0.348118	0.166667	4	0.356566	0.336806
ZCCHC2	0	0.284824	0	1	0.432936	0.336806
ZEB1	1.4158	0.364447	0.1	5	-0.227987	8.68119
ZEB2	1.1123	0.382759	0.3	5	-0.0884594	8.68119

## Sheet: Weighting Scenerio
	Weighting scenarios
	BetweennessCentrality	ClosenessCentrality	ClusteringCoefficient	Degree	logFC	ChemImpact
1	0	0	0	0	0	1
2	0	0	0	0	1	0
3	0.25	0.25	0.25	0.25	0	0
4	0.125	0.125	0.125	0.125	0.5	0
5	0.125	0.125	0.125	0.125	0	1
6	0	0	0	0	0.5	0.5
7	0.125	0.125	0.125	0.125	0.25	0.25

## Sheet: Gene prioritization score
	Ranking scores in different weighting scenarios
name	Scenerio1	Scenerio2	Scenerio3	Scenerio4	Scenerio5	Scenerio6	Scenerio7
IL6	1034.97	1.86943	3.59813	2.73378	1036.77	518.421	261.01
TNFRSF1A	726.697	0.340857	8.15119	4.24602	730.773	363.519	185.835
CRP	725.835	0.259753	3.63996	1.94986	727.655	363.047	183.344
SEC14L3	726.01	0.321214	0.334937	0.328075	726.178	363.166	181.75
ICAM1	598.244	0.458594	6.14224	3.30042	601.315	299.351	152.747
NOS2	593.416	0.042879	8.64161	4.34225	597.737	296.73	152.686
TOP2A	595.819	0.0688904	6.60775	3.33832	599.123	297.944	152.276
JUN	576.034	1.19031	14.9165	8.05338	583.492	288.612	151.764
FOS	584.628	2.67346	8.39408	5.53377	588.825	293.651	151.022
RARRES2	575.754	0.102378	0.334937	0.218657	575.921	287.928	144.132
CYP2E1	432.99	0.0176513	1.97593	0.996792	433.978	216.504	109.24
SNCA	416.629	0.35004	8.15241	4.25122	420.705	208.489	108.321
CASP3	310.013	0.231469	15.162	7.69675	317.594	155.122	85.1421
CASP8	309.437	0.300353	11.6575	5.97891	315.266	154.869	83.2631
MYC	300.714	1.64353	15.1446	8.39404	308.287	151.179	83.1617
EDN1	309.441	0.202916	4.59727	2.40009	311.74	154.822	79.7096
CDKN2A	300.689	0.340369	7.90964	4.125	304.644	150.515	79.2123
NR4A1	300.714	0.989407	7.39679	4.1931	304.413	150.852	79.1243
CXCL8	300.781	1.92854	6.87932	4.40393	304.22	151.355	79.117
CASP9	301.286	0.0350597	6.90467	3.46987	304.738	150.661	78.7826
CAMK2A	300.714	0.218797	7.04148	3.63014	304.235	150.467	78.754
PTGIS	310.004	0.152012	1.25577	0.703893	310.632	155.078	78.1669
HRAS	300.714	0.144197	4.57778	2.36099	303.003	150.429	77.5035
KRAS	300.669	0.305874	4.18655	2.24621	302.762	150.487	77.3369
SOD1	293.894	0.153557	7.63551	3.89453	297.712	147.024	77.3297
CYP1A2	300.806	0.0772738	3.83905	1.95816	302.725	150.442	77.1403
TF	300.714	0.0388409	3.38978	1.71431	302.409	150.377	76.8832
GRIN1	300.714	0.0949589	3.17395	1.63445	302.301	150.405	76.7893
GRIN2A	300.714	0.184913	2.97351	1.57921	302.201	150.45	76.7116
GRIA2	300.714	0.133895	2.88909	1.51149	302.159	150.424	76.6566
GRIN2B	300.714	0.00128778	2.9298	1.46554	302.179	150.358	76.6438
GRIA1	300.714	0.0405851	2.82896	1.43477	302.129	150.377	76.6032
COX4I1	300.714	0.261022	1.94377	1.1024	301.686	150.488	76.2157
PTGER2	300.714	0.484771	1.73417	1.10947	301.581	150.6	76.1668
PSME4	301.051	0.242452	1.0009	0.621678	301.552	150.647	75.8238
ARC	300.714	1.92718	0.320202	1.12369	300.874	151.321	75.8205
CCL2	292.494	1.01461	4.79778	2.9062	294.893	146.754	75.776
COX1	300.714	0	1.13644	0.568219	301.283	150.357	75.7468
CXCL2	296.984	1.32714	2.07249	1.69981	298.02	149.156	75.614
ATP6	300.714	0.867421	0.320202	0.593812	300.874	150.791	75.5555
ATP8	300.714	0.273012	0.320202	0.296607	300.874	150.494	75.4069
VBP1	297.228	0.212878	1.62157	0.917225	298.039	148.72	75.171
CYP1A1	292.001	1.01035	3.59869	2.30452	293.8	146.505	75.0521
CCL3	292.716	0.161914	3.38863	1.77527	294.41	146.439	74.9137
BAX	284.275	0.205663	7.40553	3.8056	287.978	142.241	74.8231
CSF2	288.755	0.607393	2.6353	1.62135	290.073	144.681	73.6583
GCLM	285.119	0.0570835	3.65044	1.85376	286.944	142.588	73.1193
CCND1	274.764	0.334263	8.44058	4.38742	278.985	137.549	72.9949
GSS	285.119	0.167445	1.07723	0.622338	285.658	142.643	71.8603
E2F2	283.871	0.562785	1.21853	0.890659	284.48	142.217	71.7177
PCBP2	275.19	0.253122	5.67129	2.96221	278.025	137.721	71.6964
DRD2	283.871	0.104164	1.34065	0.722409	284.541	141.988	71.6641
CCL11	283.871	0.0141045	1.34591	0.680008	284.544	141.943	71.6442
GGT1	283.871	0.198879	1.07751	0.638195	284.41	142.035	71.5562
CBS	283.569	0.351938	1.07811	0.715024	284.108	141.96	71.5192
GSR	275.19	0.248548	3.45703	1.85279	276.918	137.719	70.5881
IL1B	270.331	0.990056	3.61648	2.30327	272.139	135.66	69.6384
APP	1.31653	0.294317	33.6481	16.9712	18.1406	0.805423	17.2268
FN1	4.85899	0.0469863	31.6392	15.8431	20.6786	2.45299	17.0461
TRPA1	64	0.154211	1.75894	0.956573	64.8795	32.0771	16.918
TP53	0.00133239	0.300358	32.9171	16.6087	16.4599	0.150845	16.534
ESR1	0.0185012	0.0655866	27.6476	13.8566	13.8423	0.0420439	13.8448
EGFR	0.105933	0.276313	22.8956	11.586	11.5537	0.191123	11.5434
CDK2	0.15	0.375466	21.6377	11.0066	10.9689	0.262733	10.9502
HSPA5	9.26249	0.138677	17.1541	8.64639	17.8395	4.70059	10.9273
MAPK1	9.11619	0.0837019	17.1579	8.62079	17.6951	4.59995	10.8789
VCAM1	3.71329	0.131693	19.132	9.63185	13.2793	1.92249	10.5273
CTNNB1	8.28271	0.240601	16.6533	8.44694	16.6094	4.26165	10.4575
CAT	26.1765	0.336412	6.14774	3.24208	29.2504	13.2565	9.70211
CDKN1A	9.60831	0.459558	14.1712	7.3154	16.6939	5.03393	9.60259
HNRNPA1	4.40556e-05	0.412326	17.9036	9.15797	8.95185	0.206185	9.0549
HDAC1	0.0583333	0.0783025	17.6472	8.86276	8.88194	0.0683179	8.85776
CDK1	8.83124	0.124617	13.1575	6.64107	15.41	4.47793	8.81772
MDM2	0.302218	0.607793	16.9007	8.75425	8.75257	0.455006	8.67786
AKT1	0.0857625	0.270769	17.1434	8.7071	8.65748	0.178266	8.66085
MAPK3	9.11619	0.108812	12.6544	6.38161	15.4434	4.6125	8.63346
RELA	0.336806	0.113248	16.907	8.51012	8.7903	0.225027	8.56601
LMNA	13.113	0.175471	10.408	5.29172	18.3169	6.64422	8.52609
BCL2	8.56753	0.149979	12.1623	6.15616	14.6487	4.35875	8.26055
H2AFX	8.68124	0.286004	11.6532	5.96961	14.5078	4.48362	8.06842
SRC	0.266667	0.167273	15.6461	7.9067	8.08973	0.21697	7.93155
AR	0.0261129	0.371979	15.6505	8.01124	7.85137	0.199046	7.92478
RB1	0.391667	0.00948898	15.4103	7.70988	8.0968	0.200578	7.80542
HSPA8	4.40556e-05	0.782857	15.1605	7.97169	7.5803	0.39145	7.77598
SIRT1	8.68119	0.261144	10.8965	5.57883	14.1295	4.47117	7.68385
ACTB	4.43177	0.256302	12.9007	6.5785	10.8821	2.34404	7.62237
HIF1A	5.97752	0.281146	11.4178	5.84946	11.6864	3.12933	7.27356
NFKB1	8.7273	0.268608	9.90985	5.08923	13.6822	4.49796	7.2039
PCNA	4.43182	0.113832	11.6504	5.8821	10.257	2.27283	6.96159
HSPB1	4.40556e-05	0.679129	13.3941	7.03659	6.69707	0.339587	6.86682
PARP1	4.40556e-05	0.536648	13.4062	6.97143	6.70315	0.268346	6.83728
MAPK8	4.40556e-05	0.223532	13.4134	6.81847	6.70675	0.111788	6.7626
PRKDC	0.115007	0.35355	13.1525	6.75302	6.69125	0.234279	6.69338
SP1	0.00777778	0.377566	13.1596	6.76858	6.58758	0.192672	6.67613
GAPDH	0.0455559	0.0179506	12.9128	6.46538	6.50196	0.0317533	6.47228
PKM	8.68119	0.254976	8.3986	4.32679	12.8805	4.46808	6.43334
CAV1	4.40556e-05	0.114269	12.3941	6.2542	6.19711	0.0571566	6.22564
DNMT1	8.99192	0.027434	7.67359	3.85051	12.8287	4.50968	6.09164
PPARA	13.238	0.119419	5.19435	2.65688	15.8352	6.67871	5.93653
UBQLN1	8.68119	0.185363	7.37701	3.78119	12.3697	4.43328	5.90514
ALB	9.4327	0.105363	6.88404	3.4947	12.8747	4.76903	5.82654
HSPD1	0.0248958	0.35986	11.3929	5.87639	5.72135	0.192378	5.79265
CDH1	8.68124	0.0976903	7.15564	3.62666	12.2591	4.38946	5.77255
RPA2	0.0583333	0.184379	11.4025	5.79342	5.75957	0.121356	5.76191
NFE2L2	10.1383	0.481	6.16854	3.32477	13.2225	5.30964	5.73909
CLU	8.68119	0.595325	6.63365	3.61449	11.998	4.63826	5.63595
PML	0.320211	0.182739	10.9168	5.54979	5.77863	0.251475	5.58416
YWHAZ	0.0248958	0.381431	10.9011	5.64128	5.47546	0.203163	5.55215
PRDX2	8.68119	0.287147	6.38948	3.33832	11.8759	4.48417	5.43683
RUVBL1	8.68119	0.227566	6.33629	3.28193	11.8493	4.45438	5.39534
HNRNPD	4.40556e-05	0.226547	10.6601	5.44333	5.3301	0.113296	5.38671
AHR	8.75631	0.415203	6.14295	3.27908	11.8278	4.58575	5.36435
CRK	4.43182	0.188745	8.39087	4.28981	8.62725	2.31028	5.35057
UBQLN2	8.68119	0.293527	6.19619	3.24486	11.7793	4.48736	5.34177
CCT6A	8.68119	0.0764275	6.22141	3.14892	11.7919	4.37881	5.30011
HMGB1	8.68119	0.446143	5.91754	3.18184	11.64	4.56367	5.2406
MMP1	13.4152	0.746396	3.36759	2.05699	15.099	7.08081	5.2242
CAPN1	8.68119	0.357712	5.88672	3.12222	11.6246	4.51945	5.20309
TFRC	8.81246	0.352628	5.76796	3.0603	11.6964	4.58254	5.17525
PRDX6	8.68119	0.159699	5.89548	3.02759	11.6289	4.42045	5.15796
PHB	8.68119	0.124569	5.90624	3.0154	11.6343	4.40288	5.15456
BID	8.68119	0.519452	5.67259	3.09602	11.5175	4.60032	5.13646
ANXA1	8.68119	0.374262	5.72324	3.04875	11.5428	4.52773	5.12548
HSPA1A	0.00694406	2.46311	8.90444	5.68378	4.45917	1.23503	5.06974
SQSTM1	0.0583333	0.380596	9.89198	5.13629	5.00432	0.219465	5.05572
VIM	0.00626316	0.399364	9.89572	5.14754	4.95412	0.202814	5.04927
ABL1	0.125	0.251105	9.8948	5.07296	5.0724	0.188053	5.04143
NR3C1	0.0456	0.42101	9.65888	5.03995	4.87504	0.233305	4.94609
PXN	0.0583333	0.345254	9.63526	4.99026	4.87596	0.201793	4.91853
CASP7	4.64585	0.179068	7.40907	3.79407	8.35039	2.41246	4.91076
HMOX1	10.242	2.45974	3.37784	2.91879	11.9309	6.35085	4.86435
GFAP	8.68119	0.30755	5.08136	2.69446	11.2219	4.49437	4.78787
EEF2	4.24942	0.0428397	7.42398	3.73341	7.96141	2.14613	4.78506
KRT10	8.68119	0.304191	5.05298	2.67859	11.2077	4.49269	4.77284
ATF4	8.72679	0.0186928	5.15423	2.58646	11.3039	4.37274	4.76349
AURKA	4.40556e-05	0.234468	9.40151	4.81799	4.7008	0.117256	4.75938
MMP9	9.01525	0.0483782	4.90746	2.47792	11.469	4.53181	4.71964
ACTA2	8.68119	0.0122117	5.06651	2.53936	11.2144	4.3467	4.7066
ENO1	4.43186	0.00861683	7.16246	3.58554	8.01309	2.22024	4.69135
EZH2	0.391667	0.31478	8.90488	4.60983	4.84411	0.353223	4.62905
ITGB3	8.63559	0.344788	4.66092	2.50286	10.9661	4.49019	4.57556
KAT2B	0.391667	0.0634554	8.90573	4.48459	4.84453	0.227561	4.56665
CTTN	8.68119	0.252618	4.63869	2.44565	11.0005	4.46691	4.5528
ADRB2	0.0583333	0.686074	8.61679	4.65143	4.36673	0.372203	4.4945
TGFB1	8.32831	0.323034	4.62347	2.47325	10.64	4.32567	4.47457
PRDX1	0.302174	0.02507	8.73625	4.38066	4.6703	0.163622	4.44994
NOS3	8.48546	0.0277237	4.64163	2.33468	10.8063	4.25659	4.44911
PRKCD	0.2	0.292051	8.64669	4.46937	4.52334	0.246026	4.44636
CD44	8.68119	0.237898	4.40396	2.32093	10.8832	4.45955	4.43175
FOSL1	8.68119	1.11862	3.92142	2.52002	10.6419	4.8999	4.41066
CCL5	8.8503	0.00792102	4.38872	2.19832	11.0447	4.42911	4.40892
DDX39B	8.68119	0.0635307	4.39577	2.22965	10.8791	4.37236	4.38407
HRG	8.76442	0.0124833	4.37588	2.19418	10.9524	4.38845	4.38217
EIF5	8.68119	0.215247	4.29893	2.25709	10.8307	4.44822	4.37357
GSTP1	8.06101	0.0514582	4.65649	2.35397	10.3892	4.05623	4.35636
TRAF6	4.40556e-05	0.489243	8.39376	4.4415	4.19692	0.244643	4.3192
KRT18	4.82348	0.0547444	6.15747	3.10611	7.90222	2.43911	4.29829
RAF1	4.40556e-05	0.196496	8.40763	4.30206	4.20386	0.0982698	4.25295
FGA	8.68119	0.203269	4.05129	2.12728	10.7068	4.44223	4.24676
PRKACA	0.125	0.0699672	8.38852	4.22925	4.31926	0.0974836	4.243
TNFAIP3	8.68119	0.352011	3.91989	2.13595	10.6411	4.5166	4.21825
PLAUR	8.68119	0.998969	3.57653	2.28775	10.4695	4.84008	4.2083
TGM2	0.213462	0.294466	8.14593	4.2202	4.28643	0.253964	4.19995
DNAJC7	8.68119	0.0787507	4.01595	2.04735	10.6892	4.37997	4.19796
NBR1	13.113	0.244167	1.69373	0.968947	13.9599	6.67859	4.18616
ATM	4.40556e-05	0.446843	8.14623	4.29654	4.07316	0.223443	4.18484
NFKB2	8.68119	0.440446	3.80485	2.12265	10.5836	4.56082	4.18283
HNRNPL	4.40556e-05	0.308785	8.19611	4.25245	4.0981	0.154414	4.17526
IFNG	8.6166	0.0252357	4.01618	2.02071	10.6247	4.32092	4.16855
BCL2L1	0.238859	0.559953	7.90263	4.23129	4.19017	0.399406	4.15102
RDX	8.8185	0.178346	3.80034	1.98935	10.7187	4.49842	4.14938
SPRY2	8.68119	0.984718	3.46144	2.22308	10.4119	4.83296	4.1472
SON	8.68119	0.293658	3.79473	2.04419	10.5786	4.48743	4.14108
HNRNPA2B1	4.40556e-05	0.22934	8.16506	4.1972	4.08258	0.114692	4.13988
HNRNPR	4.40556e-05	0.237291	8.0852	4.16124	4.04264	0.118667	4.10193
CD40	8.68119	0.420857	3.62575	2.0233	10.4941	4.55103	4.08839
RACK1	4.40556e-05	0.0527886	8.13608	4.09443	4.06808	0.0264163	4.08125
CD86	8.84465	1.27319	3.085	2.17909	10.3872	5.05892	4.07196
DNMT3B	8.37902	0.268933	3.79245	2.03069	10.2752	4.32398	4.05821
CFH	8.68119	0.219633	3.66278	1.94121	10.5126	4.45041	4.0566
PPARG	0.0134146	0.355213	7.91729	4.13625	3.97206	0.184314	4.0508
DAXX	1.29159	0.0930978	7.38138	3.73724	4.98228	0.692344	4.03686
SNAP25	13.113	0.158728	1.43758	0.798152	13.8318	6.63587	4.03672
RARA	0.414706	0.32059	7.65793	3.98926	4.24367	0.367648	4.01279
SMC3	8.6815	0.0537451	3.62115	1.83745	10.4921	4.36762	3.99439
F8	9.03408	0.109653	3.40516	1.75741	10.7367	4.57187	3.98851
HNRNPC	4.43186	0.18651	5.65803	2.92227	7.26087	2.30919	3.98361
IL24	8.68124	0.422044	3.40571	1.91388	10.3841	4.55164	3.97868
NFKBIA	0.382406	0.550468	7.38273	3.9666	4.07377	0.466437	3.92458
S100A8	8.68119	0.558558	3.18761	1.87309	10.275	4.61988	3.90374
PTPRC	8.68119	0.347104	3.23583	1.79146	10.2991	4.51415	3.87499
HNRNPK	4.40556e-05	0.151868	7.66319	3.90753	3.83164	0.075956	3.86957
ABCC1	8.68119	0.0600933	3.29442	1.67726	10.3284	4.37064	3.83253
DNM1L	8.68119	0.0593085	3.29079	1.67505	10.3266	4.37025	3.83052
TXN	0.346067	0.180242	7.38868	3.78446	4.0404	0.263154	3.82592
TUBA1C	4.40556e-05	0.245539	7.51605	3.8808	3.75807	0.122792	3.81942
TMPO	13.5655	0.48342	0.587458	0.535439	13.8592	7.02444	3.80595
MIF	8.68119	0.0628454	3.23628	1.64957	10.2993	4.37202	3.80415
PHGDH	8.68119	0.174931	3.16031	1.66762	10.2613	4.42806	3.79419
RUVBL2	0.302218	0.0290332	7.42021	3.72462	4.01232	0.165626	3.79292
ANXA6	8.68119	0.0211877	3.20209	1.61164	10.2822	4.35119	3.77664
CAPN2	8.68119	0.100346	3.13576	1.61805	10.2491	4.39077	3.76326
F3	8.70809	0.87708	2.71908	1.79808	10.0676	4.79258	3.75583
APCS	8.68119	0.0520276	3.05357	1.5528	10.208	4.36661	3.71009
EDNRA	8.68119	0.299719	2.92555	1.61263	10.144	4.49046	3.708
PSMC2	4.40556e-05	0.242469	7.27104	3.75676	3.63557	0.121257	3.69615
CALR	1.24821	0.155303	6.62392	3.38961	4.56017	0.701758	3.66284
TLR2	8.68119	0.455885	2.75372	1.6048	10.0581	4.56854	3.66113
SEPTIN9	8.68119	0.112089	2.85202	1.48205	10.1072	4.39664	3.62433
SOX2	0.171192	0.0317326	7.12701	3.57937	3.7347	0.101463	3.61424
CLDN1	8.68119	0.299978	2.73371	1.51685	10.048	4.49059	3.61215
CYP1B1	8.3791	0.319433	2.85098	1.58521	9.80459	4.34926	3.60012
CD40LG	8.68119	0.226861	2.73312	1.47999	10.0478	4.45403	3.59357
ANXA5	8.68124	0.333625	2.65903	1.49633	10.0108	4.50743	3.58323
PLK1	4.40556e-05	0.421462	6.88975	3.65561	3.44492	0.210753	3.55025
CDH2	8.68119	0.384416	2.5444	1.46441	9.95339	4.5328	3.5386
IRS1	0.0583333	0.23924	6.91736	3.5783	3.51701	0.148787	3.53307
PRPF31	8.68119	0.195464	2.62329	1.40938	9.99284	4.43833	3.53081
BIRC2	0.0456	0.0639872	6.99354	3.52876	3.54237	0.0547936	3.52416
EGF	8.68119	0.119963	2.6372	1.37858	9.99979	4.40058	3.51889
FAS	0.258377	0.459744	6.6693	3.56452	3.59303	0.359061	3.51418
GLOD4	4.43182	0.119734	4.70639	2.41306	6.78501	2.27578	3.49108
C3	8.68119	0.0721507	2.58146	1.32681	9.97192	4.37667	3.47907
GSTM1	8.68809	0.12256	2.5033	1.31293	9.93974	4.40533	3.45431
ETS1	0.000304333	0.278387	6.76492	3.52166	3.38277	0.139346	3.45214
CD80	8.68119	0.0315948	2.54209	1.28684	9.95224	4.35639	3.44924
MPO	8.72457	0.0613853	2.48402	1.2727	9.96658	4.39298	3.4385
S100A6	8.68119	0.078179	2.49643	1.28731	9.92941	4.37969	3.43806
F12	8.68119	0.274371	2.37042	1.3224	9.86641	4.47778	3.4241
IGF1R	0.0583333	0.271244	6.67579	3.47352	3.39623	0.164789	3.42029
CCL7	8.68119	0.211431	2.38815	1.29979	9.87527	4.44631	3.41723
CCNB1	0.15	0.0939164	6.65016	3.37204	3.47508	0.121958	3.38606
LGALS3	4.40556e-05	0.173223	6.62878	3.401	3.31443	0.0866337	3.3577
LMNB2	8.68119	0.226162	2.2476	1.23688	9.80499	4.45368	3.35064
PTPN1	0.00777778	0.0682738	6.64334	3.35581	3.32945	0.0380258	3.34068
IL2	9.0417	0.000506625	2.14966	1.07509	10.1165	4.5211	3.33538
FASN	0.391667	0.0407304	6.42859	3.23466	3.60596	0.216199	3.32239
TNF	0.395139	0.101807	6.39075	3.24628	3.59051	0.248473	3.31961
SRSF9	8.68119	0.232211	2.1803	1.20626	9.77134	4.4567	3.3185
HDAC4	0.0583333	0.017895	6.59176	3.30483	3.35422	0.0381142	3.31494
KHSRP	4.43182	0.58339	4.10997	2.34668	6.4868	2.5076	3.30879
ERBB2	0.000304333	0.3973	6.39937	3.39834	3.19999	0.198802	3.29909
IL1A	9.18337	0.612897	1.66882	1.14086	10.0178	4.89813	3.28348
RGS4	8.68119	0.226375	2.09938	1.16288	9.73088	4.45378	3.27658
CCT7	0.0583333	0.0405271	6.49412	3.26732	3.30539	0.0494302	3.27177
SUV39H1	0.15	0.0868538	6.41875	3.2528	3.35937	0.118427	3.26859
TGM1	8.68119	0.174003	2.09967	1.13684	9.73103	4.4276	3.26364
NDRG1	2.57378	0.256342	5.1108	2.68357	5.12918	1.41506	3.26293
CCL4	8.68119	0.10948	2.11793	1.1137	9.74016	4.39534	3.25663
HNRNPH3	4.43177	0.343918	4.12245	2.23318	6.493	2.38785	3.25515
NCF1	4.40556e-05	1.05664	5.97803	3.51734	2.98906	0.528345	3.25319
ARHGDIA	4.40556e-05	0.182437	6.40171	3.29207	3.2009	0.0912403	3.24647
ACTL6A	4.43182	0.0892867	4.22054	2.15492	6.54209	2.26055	3.24055
MCM7	4.40556e-05	0.299917	6.3274	3.31366	3.16374	0.14998	3.23869
ACO1	7.03049	0.157757	2.87521	1.51648	8.4681	3.59412	3.23467
SERPINH1	0.336806	0.402226	6.07454	3.23838	3.37407	0.369516	3.22203
CYBB	8.68119	0.254102	1.97601	1.11506	9.6692	4.46765	3.22183
MGMT	0.0583333	0.171062	6.31674	3.2439	3.2167	0.114698	3.21572
ALDOA	4.40556e-05	0.0154226	6.41365	3.21454	3.20687	0.00773332	3.21069
ABCB1	8.93191	0.22197	1.8418	1.03188	9.85281	4.57694	3.20937
IGFBP4	8.68119	0.265339	1.93835	1.10184	9.65037	4.47327	3.20581
LMNB1	4.40556e-05	0.496873	6.11899	3.30793	3.05954	0.248458	3.18372
CXCL1	8.68119	1.18282	1.43025	1.30653	9.39632	4.93201	3.18113
ENO2	0.043375	0.108253	6.28297	3.19561	3.18486	0.0758141	3.17939
CDX2	8.68119	0.118468	1.94843	1.03345	9.65541	4.39983	3.17413
UBE2E1	8.68119	0.345699	1.83455	1.09012	9.59847	4.51345	3.174
ATF3	0.0704958	0.642929	5.98034	3.31163	3.06067	0.356713	3.16853
IL10	8.62286	0.0406045	1.99686	1.01873	9.62129	4.33173	3.16429
TREX1	9.17897	0.551944	1.44531	0.998626	9.90162	4.86546	3.15538
S100A7	8.28953	0.179713	2.05632	1.11801	9.31768	4.23462	3.14547
ZEB1	8.68119	0.227987	1.72006	0.974024	9.54122	4.45459	3.08733
IL2RA	8.68119	0.208216	1.71895	0.963585	9.54067	4.4447	3.08183
IL4	8.69436	0.118152	1.75582	0.936987	9.57227	4.40625	3.08104
FKBP1A	0.15	0.201696	5.98439	3.09304	3.14219	0.175848	3.08012
CXCL10	8.68119	0.0416481	1.79208	0.916866	9.57724	4.36142	3.07675
RHOC	8.68119	0.216622	1.68726	0.951942	9.52482	4.44891	3.06808
FIS1	8.68119	0.153866	1.71648	0.935173	9.53943	4.41753	3.067
CD68	8.68119	0.129174	1.72006	0.924615	9.54122	4.40518	3.06262
IFIT3	0.336806	0.0972971	5.89962	2.99846	3.28661	0.217051	3.05833
SREBF1	4.40556e-05	0.287413	5.95542	3.12142	2.97775	0.143729	3.04957
ZEB2	8.68119	0.0884594	1.69876	0.893612	9.53057	4.38483	3.0418
PLG	4.40556e-05	0.366797	5.88439	3.12559	2.94224	0.183421	3.0339
AGT	8.68119	0.0378379	1.70247	0.870154	9.53243	4.35952	3.03099
RHOA	0.00858581	0.243851	5.89667	3.07026	2.95692	0.126218	3.01144
IL1RN	8.62286	0.353895	1.52894	0.941416	9.38733	4.48838	3.00866
RAN	4.40556e-05	0.242797	5.82713	3.03496	2.91361	0.121421	2.97427
SLC7A5	8.68119	0.371666	1.42065	0.896159	9.39152	4.52643	2.97354
ACE	8.40272	0.118595	1.64601	0.882304	9.22573	4.26066	2.95334
CHRM3	8.68119	0.100545	1.50681	0.803677	9.4346	4.39087	2.94884
NCOA2	4.40556e-05	0.0816318	5.85548	2.96856	2.92779	0.0408379	2.94816
GHR	8.68119	0.209355	1.44621	0.827784	9.4043	4.44527	2.94574
GADD45A	0.336806	0.11011	5.66434	2.88723	3.16898	0.223458	2.9439
F7	8.68119	0.061465	1.51188	0.786671	9.43713	4.37133	2.9416
SFTPA1	8.68119	0.0762885	1.5027	0.789492	9.43254	4.37874	2.94072
COL1A2	0.213462	0.261418	5.62588	2.94365	3.0264	0.23744	2.93166
AGER	8.68119	0.109728	1.44585	0.777792	9.40412	4.39546	2.92066
DSC1	8.68119	0.173369	1.38376	0.778563	9.37307	4.42728	2.90552
SCGB1A1	8.68119	0.118982	1.40778	0.76338	9.38508	4.40009	2.90393
IL23A	8.68119	0.0761165	1.41938	0.747749	9.39088	4.37865	2.89902
PRPF4	0.414706	0.140094	5.52053	2.83031	3.17497	0.2774	2.89896
IL13	8.68119	0.222061	1.34401	0.783035	9.3532	4.45163	2.89782
EDNRB	8.68119	0.00743851	1.43983	0.723633	9.40111	4.34432	2.89207
SF3B4	8.68119	0.586581	1.14655	0.866567	9.25447	4.63389	2.89022
PSME3	4.40556e-05	0.281634	5.57396	2.9278	2.78703	0.140839	2.8574
CCL17	8.68119	0.0626582	1.33898	0.700821	9.35068	4.37193	2.85545
APOA4	8.68119	0.0435654	1.33806	0.69081	9.35022	4.36238	2.85022
IL12B	8.68119	0.041936	1.33501	0.688473	9.3487	4.36156	2.84829
PSMA6	4.40556e-05	0.0804538	5.65134	2.8659	2.82571	0.0402489	2.8458
AURKB	4.40556e-05	0.0558191	5.6609	2.85836	2.83049	0.0279316	2.84442
BIRC3	0.324072	0.697961	5.1705	2.93423	2.90932	0.511017	2.84076
BCL2L11	0.0190667	0.631174	5.32957	2.98037	2.68385	0.32512	2.82735
LEP	8.68897	0.146695	1.21364	0.680167	9.29579	4.41783	2.81574
CYP17A1	8.68119	0.0412571	1.2655	0.653379	9.31394	4.36122	2.81336
TIMP1	8.68115	0.272124	1.13127	0.701695	9.24678	4.47664	2.80395
AKT2	0.0248958	0.515625	5.32782	2.92172	2.68881	0.270261	2.79904
THBS1	0.00858581	0.428944	5.37793	2.90344	2.69755	0.218765	2.79835
ABCG2	8.68324	0.0925529	1.19722	0.644889	9.28185	4.38789	2.79256
EHMT2	0.163415	0.0189541	5.47017	2.74456	2.8985	0.0911844	2.78068
FGF9	8.68124	0.209162	1.11215	0.660655	9.23731	4.4452	2.77867
PTK2	0.128829	0.123388	5.42091	2.77215	2.83928	0.126109	2.77351
HSF1	0.0583333	0.224864	5.3958	2.81033	2.75623	0.141599	2.7687
CCNA2	0.200044	0.0324269	5.4146	2.72351	2.90734	0.116235	2.76542
FSHB	8.67341	0.168554	1.10612	0.637335	9.22647	4.42098	2.76355
PPIA	4.40556e-05	0.352673	5.31228	2.83248	2.65619	0.176358	2.74432
RPS6KB1	4.40556e-05	0.322679	5.32309	2.82288	2.66159	0.161362	2.74222
TLN2	8.68119	0.0445913	1.11963	0.582113	9.24101	4.36289	2.74126
NKX2-5	8.68119	0.236375	1.01128	0.623827	9.18683	4.45878	2.73503
FASLG	0.258377	0.0255878	5.32427	2.67493	2.92051	0.141983	2.73313
POU5F1	0.0583333	0.0562862	5.35972	2.708	2.73819	0.0573098	2.70852
TTC9C	8.68119	0.459115	0.843093	0.651104	9.10274	4.57015	2.70662
IL18	8.68119	0.449463	0.841112	0.645287	9.10175	4.56533	2.70322
EDN3	8.68119	0.102194	1.00213	0.552161	9.18226	4.39169	2.69691
CSF3	8.68119	1.40917	0.334937	0.872055	8.84866	5.04518	2.69006
PFN1	4.43182	0.337338	2.98664	1.66199	5.92514	2.38458	2.68561
MVP	4.43182	0.168934	3.0696	1.61927	5.96662	2.30038	2.68499
LASP1	4.43182	0.0638308	3.12103	1.59243	5.99233	2.24782	2.68443
NPEPPS	9.43395	0.100691	0.572809	0.33675	9.72036	4.76732	2.67007
BIRC5	0.00195594	0.177523	5.25014	2.71383	2.62703	0.0897395	2.66994
KLF4	0.336806	0.980773	4.66773	2.82425	2.67067	0.658789	2.66326
IL5	8.68119	0.292595	0.834937	0.563766	9.09866	4.48689	2.66092
F2	1.24821	0.0372945	4.67744	2.35737	3.58693	0.642754	2.6601
DDB2	4.40556e-05	0.243675	5.19776	2.72072	2.59892	0.12186	2.65981
COL1A1	0.125	0.113091	5.19825	2.65567	2.72413	0.119045	2.65865
IL17F	8.68119	0.235606	0.834937	0.535271	9.09866	4.4584	2.64667
APOA1	0.0583774	0.238206	5.13374	2.68597	2.62525	0.148292	2.64101
KRT9	4.43182	0.183441	2.96814	1.57579	5.91589	2.30763	2.63788
AFP	8.17902	0.000143144	1.18524	0.592693	8.77164	4.08958	2.63741
PCNP	8.68119	0.0311892	0.915436	0.473313	9.13891	4.35619	2.63581
CXCL5	8.68119	0.18546	0.836796	0.511128	9.09959	4.43333	2.63506
CCL18	8.68119	0.133786	0.843524	0.488655	9.10295	4.40749	2.62551
IL3	8.68119	0.124542	0.834937	0.479739	9.09866	4.40287	2.6189
MFN2	8.68119	0.123762	0.834937	0.479349	9.09866	4.40248	2.61871
TJP1	0.000304333	0.215444	5.12616	2.6708	2.56339	0.107874	2.61702
RELB	0.000304333	0.625683	4.91731	2.7715	2.45896	0.312994	2.61515
CKM	8.68119	0.0977017	0.834937	0.466319	9.09866	4.38945	2.61219
ADIPOQ	8.68119	0.0861269	0.834937	0.460532	9.09866	4.38366	2.6093
BPIFA1	8.68119	0.0671388	0.836641	0.45189	9.09951	4.37417	2.6054
UCP1	8.68119	0.0588529	0.835048	0.446951	9.09872	4.37002	2.60254
DYNC1I2	8.68119	0.052054	0.838295	0.445175	9.10034	4.36662	2.60246
NOX4	8.68119	0.0328944	0.83546	0.434177	9.09892	4.35704	2.59625
EIF4H	4.43182	0.174107	2.88874	1.53142	5.87619	2.30296	2.59585
EIF2S2	4.43182	0.290424	2.82603	1.55823	5.84483	2.36112	2.59357
DNMT3A	0.701618	0.389392	4.60673	2.49806	3.00498	0.545505	2.57612
MXD1	0.336806	0.430037	4.76737	2.59871	2.72049	0.383421	2.5754
LGALS1	0.00858581	0.0102208	5.13715	2.57369	2.57716	0.00940332	2.57328
MDM4	0.163415	0.788667	4.65674	2.7227	2.49178	0.476041	2.56639
PPA2	8.73953	0.320653	0.590661	0.455657	9.03486	4.53009	2.56037
PTGS2	0.352885	0.0390293	4.89877	2.4689	2.80227	0.195957	2.54736
LHB	8.68897	0.28825	0.606116	0.447183	8.99203	4.48861	2.54736
MUC5AC	8.72679	0.277057	0.586994	0.432025	9.02029	4.50192	2.54446
NLRP3	8.68119	0.268476	0.605133	0.436805	8.98376	4.47483	2.53998
SOD2	0.414706	0.425717	4.65439	2.54005	2.7419	0.420212	2.5373
CD83	8.68119	0.737189	0.334937	0.536063	8.84866	4.70919	2.52206
MUC4	8.68119	0.215033	0.586809	0.400921	8.9746	4.44811	2.51746
CCL1	8.68124	0.125131	0.612147	0.368639	8.98731	4.40318	2.50767
ABCC4	8.68119	0.148061	0.600673	0.374367	8.98153	4.41463	2.50765
IL36G	8.68119	0.128958	0.595766	0.362362	8.97908	4.40508	2.50042
OGDH	8.68119	0.109771	0.581896	0.345833	8.97214	4.39548	2.48869
DEFB4	8.63559	0.132052	0.586994	0.359523	8.92909	4.38382	2.48541
KAT8	0.391667	0.0224232	4.75676	2.38959	2.77005	0.207045	2.4819
SNAI1	4.40556e-05	2.59614	3.6648	3.13047	1.83244	1.29809	2.48145
NDC80	0.00858581	0.401744	4.75761	2.57968	2.38739	0.205165	2.48139
CCL20	8.68119	0.561065	0.334937	0.448001	8.84866	4.62113	2.47803
NEDD9	2.72317	0.300884	3.4027	1.85179	4.42452	1.51203	2.45736
SPARC	0.414706	0.205318	4.599	2.40216	2.71421	0.310012	2.45451
WFDC2	8.68119	0.394314	0.334937	0.364625	8.84866	4.53775	2.43634
COL2A1	0.000304333	0.336236	4.69737	2.5168	2.34899	0.16827	2.43282
KEAP1	0.163371	0.272237	4.63752	2.45488	2.48213	0.217804	2.42766
SERPINA1C	8.68119	0.297096	0.334937	0.316016	8.84866	4.48914	2.41204
GAL	8.68119	0.276086	0.334937	0.305511	8.84866	4.47864	2.40679
CYP11A1	8.68119	0.225444	0.334937	0.28019	8.84866	4.45332	2.39413
SLC15A1	8.72457	0.188437	0.325232	0.256835	8.88718	4.4565	2.39087
MRC1	8.68119	0.190795	0.334937	0.262866	8.84866	4.43599	2.38547
DDIT3	0.496774	0.479157	4.28083	2.37999	2.63719	0.487965	2.3844
BAD	0.0190226	0.263541	4.61397	2.43876	2.32601	0.141282	2.37763
CLCA1	8.68119	0.152018	0.334937	0.243477	8.84866	4.41661	2.37577
TPT1	0.0248518	0.285705	4.58837	2.43704	2.31904	0.155278	2.37183
AIF1	8.68119	0.134852	0.334937	0.234894	8.84866	4.40802	2.37148
IL9	8.68119	0.133573	0.334937	0.234255	8.84866	4.40738	2.37116
RARRES1	8.68119	0.138874	0.311472	0.225173	8.83693	4.41003	2.36075
BCL2A1	0.336806	0.154298	4.45983	2.30706	2.56672	0.245552	2.35269
SLCO1B3	8.68119	0.0315452	0.334937	0.183241	8.84866	4.35637	2.34565
CYP2C9	8.68119	0.0200449	0.334937	0.177491	8.84866	4.35062	2.34278
SLCO1B1	8.68119	0.000558431	0.334937	0.167748	8.84866	4.34088	2.33791
FH	0.043375	0.0687818	4.61762	2.3432	2.35219	0.0560784	2.33685
TCRB	8.68119	0	0.319549	0.159774	8.84097	4.3406	2.33007
HIST2H3A	0.336806	0.237087	4.36113	2.29911	2.51737	0.286946	2.32404
RAB8B	4.43182	0.0921079	2.38535	1.23873	5.6245	2.26196	2.32366
CNN2	4.43182	0.612524	2.08354	1.34803	5.47359	2.52217	2.30286
KRT1	0.352885	0.0380513	4.39512	2.21659	2.55044	0.195468	2.29529
KRT8	4.40556e-05	0.166606	4.49728	2.33194	2.24868	0.0833251	2.2903
PSMB4	4.40556e-05	0.0833601	4.5122	2.29778	2.25614	0.0417021	2.27695
SRPK1	0.0583333	0.132967	4.39848	2.26572	2.25757	0.0956501	2.24706
UBE2A	0.163415	0.139614	4.285	2.21231	2.30591	0.151514	2.21826
MAP3K1	4.40556e-05	0.236207	4.30559	2.2709	2.15284	0.118126	2.21186
NQO1	4.40556e-05	0.0574923	4.3925	2.225	2.1963	0.0287682	2.21064
PPIB	4.40556e-05	0.0179442	4.39596	2.20695	2.19803	0.00899413	2.20248
STX11	0.391667	0.398396	3.9976	2.198	2.39047	0.395031	2.19631
HNF4A	0.0248958	0.172027	4.28262	2.22732	2.16621	0.0984612	2.19054
VAV3	4.43182	0.19012	2.05872	1.12442	5.46118	2.31097	2.18485
TXNRD1	4.40556e-05	0.455596	4.13049	2.29304	2.06529	0.22782	2.17916
IRF1	2.38636	0.749518	2.78568	1.7676	3.7792	1.56794	2.17681
MME	0.00777778	0.471271	4.11113	2.2912	2.06334	0.239524	2.17533
TRAP1	4.40556e-05	0.174476	4.17896	2.17672	2.08952	0.0872599	2.13311
IGFBP3	0.0583333	0.65576	3.88338	2.26957	2.00002	0.357047	2.12021
NDUFV1	4.43182	0.247185	1.90086	1.07402	5.38225	2.3395	2.12018
PLS3	0.33685	0.145116	3.95934	2.05223	2.31652	0.240983	2.10016
PMAIP1	0.0583333	0.124009	4.10838	2.11619	2.11252	0.0911712	2.09977
MMP2	0.139719	0.0100613	4.10634	2.0582	2.19289	0.0748901	2.09062
LATS2	0.0248958	0.4741	3.91861	2.19635	1.9842	0.249498	2.08405
SRM	4.43182	0.104878	1.88754	0.996208	5.37559	2.26835	2.07794
BCL6	0.336806	0.118091	3.91505	2.01657	2.29433	0.227448	2.07125
EGR1	0.110241	1.09924	3.51476	2.307	1.86762	0.604741	2.05975
CD36	0.391667	0.0126023	3.90713	1.95987	2.34523	0.202134	2.05463
HERC5	0.336806	0.0662617	3.89895	1.98261	2.28628	0.201534	2.05024
CASP6	0.0456	0.207658	3.96278	2.08522	2.02699	0.126629	2.04471
APOE	0.0456	0.380315	3.80944	2.09488	1.95032	0.212958	2.0112
MECP2	0.00777778	0.191114	3.88137	2.03624	1.94846	0.0994456	1.99041
FKBP5	0.15	0.157661	3.81273	1.98519	2.05636	0.153831	1.98328
NCF2	0.336806	0.134065	3.72223	1.92815	2.19792	0.235435	1.97883
CDK5R1	0.352885	0.199141	3.62452	1.91183	2.16515	0.276013	1.95027
ANP32A	4.40556e-05	0.445187	3.63386	2.03952	1.81697	0.222615	1.92824
ACLY	0.043375	0.040262	3.77789	1.90908	1.93232	0.0418185	1.90985
IRS2	0.0583333	0.419403	3.53615	1.97778	1.82641	0.238868	1.88751
ITGA6	4.43182	0.304808	1.40362	0.854215	5.13363	2.36831	1.88597
S100A9	0.163415	0.461262	3.4524	1.95683	1.88962	0.312338	1.88237
USF1	0.336806	0.0156274	3.573	1.79431	2.12331	0.176216	1.87461
SP3	0.414706	0.210525	3.4337	1.82211	2.13155	0.312615	1.87316
NME1	4.40556e-05	0.0663273	3.6869	1.87662	1.8435	0.0331857	1.86004
TNFRSF1B	4.40556e-05	0.122579	3.63383	1.8782	1.81696	0.0613117	1.84757
CACYBP	4.40556e-05	0.765148	3.26156	2.01336	1.63083	0.382596	1.82208
EIF5A	4.43182	0.0322785	1.3631	0.697691	5.11337	2.23205	1.79758
ITGA2	0.000304333	0.119928	3.52648	1.82321	1.76355	0.0601163	1.7933
IGF1	0.00777778	0.139013	3.51218	1.8256	1.76387	0.0733952	1.79279
MYLK	0.35258	0.285063	3.22071	1.75289	1.96294	0.318822	1.76977
XPA	0.0583774	0.56264	3.21854	1.89059	1.66765	0.310509	1.76452
UGDH	4.40556e-05	0.313082	3.36151	1.83729	1.6808	0.156563	1.75903
ALDH2	0.0456	0.0131724	3.48664	1.74991	1.78892	0.0293862	1.75801
TTR	4.40556e-05	0.223817	3.40309	1.81345	1.70159	0.111931	1.75751
CTH	0.638979	0.266064	3.0375	1.65178	2.15773	0.452522	1.74501
CIAPIN1	4.43182	0.399188	1.07403	0.736609	4.96883	2.4155	1.74477
DNAJB9	0.336806	0.558855	3.01477	1.78681	1.84419	0.44783	1.7313
CXCR4	0.33685	0.717624	2.87216	1.79489	1.77293	0.527237	1.6997
DNAJB11	0.391667	0.0910854	3.15463	1.62286	1.96898	0.241376	1.69801
MAP3K8	0.336806	1.03117	2.68446	1.85781	1.67903	0.68399	1.68422
XBP1	0.336806	0	3.13076	1.56538	1.90218	0.168403	1.64958
IL16	0.163415	0.203339	3.1006	1.65197	1.71372	0.183377	1.64199
VEGFA	0.0248958	0.747496	2.86735	1.80742	1.45857	0.386196	1.62677
FANCD2	0.125	0.588202	2.89149	1.73984	1.57074	0.356601	1.62404
APOB	0.043375	0.12142	3.14978	1.6356	1.61826	0.0823974	1.61609
SLC3A2	0.0248958	0.501765	2.91115	1.70646	1.48047	0.26333	1.58724
HERPUD1	0.0456	0.412529	2.94527	1.6789	1.51823	0.229065	1.58717
MYL6	4.40556e-05	0.0910596	3.09876	1.59491	1.54942	0.0455518	1.57216
TPR	4.40556e-05	0.498126	2.87811	1.68812	1.4391	0.249085	1.5636
COL4A1	0.125	0.154404	2.97349	1.56395	1.61174	0.139702	1.5566
DPP4	0.15	0.016604	3.02126	1.51893	1.66063	0.083302	1.55228
PON1	0.00777778	0.076972	3.04622	1.5616	1.53089	0.0423749	1.5443
MSH6	4.40556e-05	0.129671	2.99405	1.56186	1.49707	0.0648575	1.52946
G6PD	0.043375	0.119416	2.97673	1.54807	1.53174	0.0813956	1.52906
IL4R	0.15	0.380429	2.7885	1.58447	1.54425	0.265215	1.52686
KLK3	0.00828148	0.0965934	2.99845	1.54752	1.50751	0.0524374	1.52545
HNRNPLL	0.336806	0.404824	2.67142	1.53812	1.67252	0.370815	1.52112
MAP4	0.414706	0.336452	2.65854	1.4975	1.74398	0.375579	1.51706
ITPR1	0.125	0.220153	2.85816	1.53916	1.55408	0.172577	1.51537
SLC6A3	0.336806	0.15738	2.77654	1.46696	1.72508	0.247093	1.51182
GSTO1	4.40556e-05	0.119802	2.91331	1.51656	1.4567	0.0599232	1.48662
COPS8	4.40556e-05	0.502314	2.7013	1.60181	1.35069	0.251179	1.47624
ANXA3	4.43182	0.289707	0.586681	0.438194	4.72516	2.36076	1.47372
MKI67	0.002	0.559946	2.65687	1.60841	1.33043	0.280973	1.46892
CTSB	4.40556e-05	0.0118423	2.89496	1.4534	1.44752	0.00594319	1.45045
DDAH2	0.302174	0.080565	2.69991	1.39024	1.65213	0.191369	1.44564
CCNE1	4.40556e-05	0.310579	2.73546	1.52302	1.36778	0.155311	1.44539
TUFM	4.40556e-05	0.0520603	2.86289	1.45747	1.43149	0.0260522	1.44447
TLR4	4.40556e-05	1.32632	2.22519	1.77576	1.11264	0.663183	1.44419
UROD	2.38636	0.128755	1.6047	0.866725	3.18871	1.25756	1.43113
ADM	0.352885	1.44661	1.96201	1.70431	1.33389	0.899746	1.43088
GADD45B	0.0456	0.764191	2.44644	1.60531	1.26882	0.404896	1.42567
MYDGF	4.43182	0.0951574	0.579907	0.337532	4.72177	2.26349	1.4217
LIG3	1.24821	0.102167	2.16585	1.13401	2.33114	0.675191	1.42052
SERPINE1	0.0583333	0.429239	2.59507	1.51215	1.35587	0.243786	1.41943
DHFR	4.40556e-05	0.185897	2.74324	1.46457	1.37166	0.0929705	1.4181
ZACN	0.0583333	0.0696689	2.69043	1.38005	1.40355	0.0640011	1.37721
RPRD1B	0.0794	0.123082	2.64758	1.38533	1.40319	0.101241	1.37441
IER3	0.00858581	1.56057	1.95924	1.7599	0.988205	0.784576	1.37191
SPP1	0.163415	0.00531082	2.61086	1.30808	1.46884	0.0843627	1.34761
CXCR5	4.40556e-05	0.11341	2.62658	1.37	1.31334	0.056727	1.34165
NOS1	0.0248958	0.167966	2.55106	1.35951	1.30042	0.0964308	1.32374
TNFSF10	0.15	0.305349	2.41519	1.36027	1.35759	0.227675	1.32143
PPBP	4.40556e-05	0.0280641	2.61965	1.32385	1.30987	0.0140541	1.31685
SLC2A1	0.391667	0.314186	2.27997	1.29708	1.53165	0.352926	1.31645
KCNJ4	0.1775	0.0500173	2.46044	1.25523	1.40772	0.113759	1.2871
PELI1	0.15	0.685342	2.13655	1.41095	1.21828	0.417671	1.27711
BUB3	4.40556e-05	0.590407	2.22557	1.40799	1.11283	0.295226	1.2604
SPIB	0.338462	0.297171	2.18654	1.24185	1.43173	0.317816	1.25218
MMP14	0.1991	0.0584792	2.36946	1.21397	1.38383	0.12879	1.24912
TWIST1	0.0456	0.0160382	2.46288	1.23946	1.27704	0.0308191	1.24685
ATP7B	0.238357	0.18194	2.28102	1.23148	1.37887	0.210149	1.24559
RANBP1	0.0583333	0.10565	2.40143	1.25354	1.25905	0.0819918	1.24171
GLO1	4.40556e-05	0.0580981	2.44521	1.25165	1.22265	0.0290711	1.23714
AKR1C1	0.0112658	1.09111	1.90928	1.5002	0.965906	0.551188	1.23023
KCNA5	0.0456	0.0887005	2.38151	1.2351	1.23635	0.0671503	1.22433
NAMPT	0.336806	0.327325	2.10564	1.21648	1.38962	0.332065	1.21885
CDC34	0.0456	0.432444	2.18676	1.3096	1.13898	0.239022	1.21289
IFIT2	0.336806	0.412426	2.04659	1.22951	1.3601	0.374616	1.2106
PSMC4	4.40556e-05	0.317572	2.22416	1.27087	1.11212	0.158808	1.19148
ADCY5	0.139423	0.1417	2.21624	1.17897	1.24754	0.140561	1.1784
IRF8	0.00777778	0.343336	2.17372	1.25853	1.09464	0.175557	1.17464
ETV4	2.38636	0.423263	0.938073	0.680668	2.8554	1.40481	1.17144
GLUD1	4.40556e-05	0.306132	2.17301	1.23957	1.08655	0.153088	1.16305
SESN2	4.40556e-05	0.49027	2.08062	1.28544	1.04035	0.245157	1.16289
KLK5	0.0583333	0.0292727	2.26178	1.14553	1.18922	0.043803	1.15279
CP	0.0326736	0.1029	2.22763	1.16526	1.14649	0.0677867	1.14771
MBD2	0.302174	0.388881	1.9492	1.16904	1.27677	0.345527	1.14736
UBA52	0.163415	0.072407	2.17659	1.1245	1.25171	0.117911	1.14725
NR1I2	4.40556e-05	0.111507	2.22735	1.16943	1.11372	0.0557757	1.14156
ARG1	4.40556e-05	0.110999	2.21704	1.16402	1.10856	0.0555218	1.13628
IFIT1	0.336806	0.380364	1.88818	1.13427	1.2809	0.358585	1.12338
SIRT3	1.22332	0.348277	1.45891	0.903591	1.95277	0.785798	1.12235
PECAM1	0.336806	0.112599	2.00303	1.05782	1.33832	0.224702	1.11387
MYH11	4.40556e-05	0.596165	1.91858	1.25737	0.959336	0.298105	1.10834
ACO2	0.067375	0.0757641	2.14322	1.10949	1.13899	0.0715695	1.1074
BBC3	4.40556e-05	0.224511	2.08685	1.15568	1.04347	0.112278	1.09956
KRT19	4.40556e-05	0.14398	2.12709	1.13554	1.06359	0.0720121	1.09955
ACHE	0.124956	0.132235	2.02263	1.07743	1.13627	0.128596	1.07561
BACE1	0.00777778	0.395636	1.94273	1.16918	0.979143	0.201707	1.07222
TFF1	1.04821	0.041975	1.59552	0.818749	1.84598	0.545095	1.07031
NFE2L1	0.0456	0.395476	1.91553	1.1555	1.00337	0.220538	1.06804
KLK8	0.508013	0.150535	1.79311	0.971824	1.40457	0.329274	1.06119
ALAD	0.0326736	0.0408148	2.06894	1.05488	1.06714	0.0367442	1.05284
GOT2	0.0583333	0.115103	1.99796	1.05653	1.05731	0.0867181	1.04234
PRL	0.336806	0.160121	1.83593	0.998024	1.25477	0.248463	1.04219
IVL	0.352885	0.28477	1.76463	1.0247	1.2352	0.318827	1.04173
IFNGR2	0.336806	0.238087	1.79046	1.01427	1.23203	0.287446	1.03895
DTNA	0.414706	0.106972	1.79303	0.95	1.31122	0.260839	1.02693
LOR	0.352885	0.32049	1.71472	1.01761	1.21025	0.336687	1.0257
MMP13	0.15	0.0494653	1.93741	0.993436	1.1187	0.0997327	1.01857
NFAT5	0.336806	0.269229	1.72995	0.999589	1.20178	0.303017	1.01648
SHC3	0.391667	0.593471	1.53294	1.0632	1.15813	0.492569	1.01275
SLC38A2	0.0583333	1.32603	1.26358	1.29481	0.690124	0.692184	0.977883
KDM4A	0.391667	0.0243905	1.7321	0.878244	1.25772	0.208029	0.970063
CLSPN	4.40556e-05	0.972496	1.4449	1.2087	0.722492	0.48627	0.965583
FXYD2	0.530385	0.402391	1.46279	0.932588	1.26178	0.466388	0.964587
CCS	0.0248958	0.268631	1.72851	0.998569	0.889149	0.146764	0.937635
CCR2	0.125	0.490116	1.537	1.01356	0.893501	0.307558	0.92228
SELP	4.40556e-05	0.321568	1.67229	0.996927	0.836187	0.160806	0.916546
TNFRSF11B	0.0583333	0.225877	1.66658	0.946228	0.891623	0.142105	0.904342
NUDT9	0.177174	0.00181004	1.71889	0.86035	1.03662	0.089492	0.904191
PPM1D	4.40556e-05	0.945081	1.30083	1.12296	0.650461	0.472562	0.886698
PRNP	4.40556e-05	0.167445	1.68672	0.927084	0.843405	0.0837446	0.885233
FECH	0.0248958	0.304992	1.60395	0.954469	0.826869	0.164944	0.884445
EIF2A	0.024	0.205747	1.64541	0.925578	0.846705	0.114873	0.880142
GSTM3	4.40556e-05	0.0346698	1.73795	0.886309	0.869018	0.0173569	0.877653
PTX3	0.302174	1.48518	0.835048	1.16011	0.719698	0.893677	0.864363
CUX1	2.38636	0.428228	0.316049	0.372138	2.54439	1.4073	0.861672
STOML2	0.336806	0.245127	1.42787	0.836496	1.05074	0.290966	0.859416
CCND2	0.0190667	0.0671203	1.66013	0.863625	0.849132	0.0430935	0.851612
GCLC	1.24821	0.49222	0.817401	0.65481	1.65691	0.870217	0.843809
MYOG	4.40556e-05	0.316028	1.50496	0.910495	0.752526	0.158036	0.8315
SLC31A1	0.336806	0.332452	1.32303	0.827739	0.998319	0.334629	0.828827
CBR1	4.40556e-05	0.270683	1.5193	0.89499	0.759693	0.135364	0.82733
USP18	0.000304333	0.0565775	1.60975	0.833164	0.80518	0.0284409	0.819096
PF4	4.40556e-05	0.102504	1.58176	0.84213	0.790922	0.0512742	0.816515
NR2E3	0.15	0.159431	1.47299	0.816213	0.886497	0.154716	0.813855
KLK1	0.522971	0.00284951	1.3498	0.676323	1.19787	0.26291	0.806353
TFAM	0.0039125	0.3382	1.44165	0.889925	0.724737	0.171056	0.806353
COL4A6	0.000304333	0.103829	1.55144	0.827632	0.776022	0.0520665	0.801751
KDM3A	0.163415	0.192274	1.40519	0.79873	0.866007	0.177844	0.791515
ERCC5	4.40556e-05	0.341463	1.40413	0.872796	0.702108	0.170754	0.787441
PTGES2	0.0456	0.207619	1.42068	0.814148	0.755939	0.126609	0.773643
CASP12	0.004975	0.222322	1.42083	0.821574	0.715388	0.113649	0.767237
WNT5A	0.352929	0.310719	1.19847	0.754595	0.952164	0.331824	0.765147
STIM1	4.40556e-05	0.00067252	1.50635	0.753511	0.753218	0.000358288	0.753353
FABP3	0.414706	0.117165	1.23195	0.674558	1.03068	0.265935	0.748943
RELN	0.414706	0.423148	1.07734	0.750242	0.953374	0.418927	0.748131
PIGR	0.043375	0.237121	1.33664	0.786881	0.711696	0.140248	0.738445
ZC3HAV1	0.336806	0.356566	1.12876	0.742664	0.901186	0.346686	0.737724
PYCR2	0.336806	0.153146	1.22337	0.688258	0.94849	0.244976	0.734172
NDUFV2	0.0583333	0.149313	1.36227	0.755793	0.739469	0.103823	0.733048
MCU	0.00777778	0.138094	1.39202	0.765058	0.703789	0.0729359	0.732479
IGFALS	0.391667	0.207587	1.1642	0.685891	0.973764	0.299627	0.731911
ALDH1A1	0.0456	0.0205812	1.41461	0.717597	0.752906	0.0330906	0.723851
KCNN3	0.352885	0.00479071	1.26131	0.63305	0.983539	0.178838	0.720074
HP	0.00777778	0.0425954	1.414	0.7283	0.71478	0.0251866	0.719595
HLA-A	0.302174	0.39257	1.08156	0.737066	0.842955	0.347372	0.714467
GPX1	0.043375	0.111345	1.33247	0.721906	0.709608	0.0773602	0.704913
CADM1	0.000304333	0.138665	1.336	0.737333	0.668305	0.0694848	0.702743
NFIB	0.336806	0.776382	0.83279	0.804586	0.7532	0.556594	0.694692
HTR1A	0.352885	0.240716	1.08341	0.662061	0.894587	0.2968	0.690103
MCAM	0.414706	0.256683	1.02617	0.641428	0.927792	0.335695	0.680933
ATP7A	0.0248958	0.340769	1.17728	0.759026	0.613538	0.182832	0.680058
RPIA	4.40556e-05	0.0319241	1.34115	0.686536	0.670618	0.0159841	0.678566
CASR	0.516299	0.0360576	1.07299	0.554526	1.0528	0.276178	0.674586
AGR2	4.40556e-05	0.222693	1.22269	0.722692	0.611389	0.111369	0.66703
EHHADH	4.40556e-05	0.285396	1.18075	0.733072	0.590418	0.14272	0.661734
RP9P	4.40556e-05	2.00243	0.321206	1.16182	0.160647	1.00123	0.66122
CAR3	0.391667	0.0169202	1.09325	0.555085	0.938291	0.204293	0.648771
PRRC2C	4.40556e-05	0.157099	1.21249	0.684797	0.606291	0.0785714	0.645533
KCNN2	0.352885	0.0696556	1.07843	0.574041	0.892098	0.21127	0.644849
FBN1	0.0248958	0.260559	1.13563	0.698093	0.592709	0.142728	0.639177
PAH	0.336806	0.0575224	1.07079	0.564158	0.872202	0.197164	0.633978
EVI2A	0.336806	0.2657	0.953289	0.609494	0.81345	0.301253	0.627271
BBOX1	0.043375	0.802353	0.817378	0.809865	0.452064	0.422864	0.620121
SLC39A4	0.391667	0.141295	0.971333	0.556314	0.877333	0.266481	0.618907
CYP2A6	1.24826	0	0.608992	0.304496	1.55275	0.624129	0.616561
NRF1	0.00777778	0.07002	1.18733	0.628675	0.601443	0.0388989	0.613115
UGT1A9	1.24821	0	0.596163	0.298082	1.5463	0.624107	0.610135
KCNJ2	0.1775	0.23907	0.996741	0.617906	0.675871	0.208285	0.602513
CA2	0.00777778	0.688203	0.8378	0.763002	0.426678	0.34799	0.592895
GLRA1	0.0417708	0.137287	1.08209	0.609686	0.582814	0.0895287	0.585807
NCAM1	0.00777778	0.12939	1.086	0.607697	0.55078	0.0685839	0.577294
SATB2	0.30951	0.134354	0.923847	0.5291	0.771433	0.221932	0.572889
HIVEP2	0.336806	0.730335	0.59145	0.660892	0.63253	0.53357	0.56251
ODC1	0.043375	0.0497704	1.07683	0.563298	0.581788	0.0465727	0.561699
HMBS	0.0248958	0.185678	1.00612	0.5959	0.527957	0.105287	0.555704
DPT	0.336806	0.0685989	0.877158	0.472879	0.775385	0.202702	0.53993
ERCC1	4.40556e-05	0.131961	1.01357	0.572766	0.506829	0.0660025	0.539786
UGT1A6	0.00828148	0.967726	0.589965	0.778846	0.303264	0.488004	0.538984
GUCY1A1	0.024	0.269934	0.923383	0.596658	0.485691	0.146967	0.535175
GPD1	0.043375	0.119921	0.986441	0.553181	0.536595	0.0816479	0.534044
PTH	0.1775	0.315939	0.816937	0.566438	0.585968	0.246719	0.531828
BTG1	0.336806	0.0759352	0.853362	0.464649	0.763487	0.20637	0.529866
ETFB	4.40556e-05	0.25143	0.932995	0.592212	0.466541	0.125737	0.529366
DDAH1	0.302174	0.171187	0.821944	0.496566	0.713146	0.23668	0.529312
BMP8B	0.336806	0.133515	0.821206	0.477361	0.747409	0.23516	0.528183
RAB11FIP1	0.336806	0.117697	0.821206	0.469451	0.747409	0.227251	0.524229
OTX1	4.40556e-05	0.148404	0.962889	0.555646	0.481488	0.0742239	0.518556
SLC7A11	0.00828148	0.391593	0.825973	0.608783	0.421268	0.199937	0.512955
GUCY1B1	0.024	0.189888	0.918646	0.554267	0.483323	0.106944	0.512795
P2RX7	0.00858581	0.349062	0.834604	0.591833	0.425888	0.178824	0.506714
CD274	0.163415	0.185725	0.829365	0.507545	0.578097	0.17457	0.501967
ABCB6	4.40556e-05	0.28123	0.836719	0.558974	0.418403	0.140637	0.488678
SHANK3	0.000304333	0.2426	0.839065	0.540832	0.419837	0.121452	0.480258
CELSR2	0.000304333	0.244366	0.828622	0.536494	0.414615	0.122335	0.475478
IGFBP6	0.0248958	0.00156941	0.935155	0.468362	0.492473	0.0132326	0.474194
FAM21C	0.336806	0.411038	0.571206	0.491122	0.622409	0.373922	0.472564
LCAT	0.0248958	0.181108	0.835886	0.508497	0.442839	0.103002	0.469444
PKLR	0.0583333	0.112332	0.841783	0.477057	0.479225	0.0853328	0.463558
LSS	0.391667	0.278368	0.578551	0.42846	0.680942	0.335018	0.456784
STAR	4.40556e-05	0.118422	0.838295	0.478359	0.419192	0.0592332	0.448764
GNRHR	0.15	0.00532307	0.819549	0.412436	0.559774	0.0776615	0.448605
SLCO2B1	0.414706	0.188651	0.592866	0.390759	0.711139	0.301679	0.447272
DENND5A	0.336806	0.235708	0.604106	0.419907	0.638859	0.286257	0.445182
IFNB1	0.125	0.0126365	0.820279	0.416458	0.535139	0.0688182	0.444548
TPO	0.414706	0.169485	0.596699	0.383092	0.713056	0.292095	0.444397
FCAR	4.40556e-05	0.050786	0.832205	0.441495	0.416146	0.025415	0.42881
FEZ2	0.336806	0.205619	0.574926	0.390273	0.624268	0.271212	0.423069
ABCB11	0.391667	0.141059	0.578551	0.359805	0.680942	0.266363	0.422457
EGR3	0.336806	0.689946	0.321206	0.505576	0.497409	0.513376	0.417291
TST	0.0583333	0.598362	0.5	0.549181	0.308333	0.328348	0.414174
NT5C3A	0.237462	0.242426	0.584253	0.41334	0.529588	0.239944	0.412099
MT3	0.0583333	0.409451	0.585547	0.497499	0.351107	0.233892	0.40972
KCNJ15	0.1775	0.293826	0.579669	0.436748	0.467335	0.235663	0.407666
CYP4F3	0.35	0.117303	0.575047	0.346175	0.637523	0.233651	0.404349
CARMIL3	0.336806	0.131604	0.571206	0.351405	0.622409	0.234205	0.402705
FLVCR1	0.336806	0.0639348	0.592112	0.328023	0.632861	0.20037	0.396241
VMP1	0.336806	0.0722759	0.576268	0.324272	0.624939	0.204541	0.390404
AK3	0.0583333	0.321371	0.588413	0.454892	0.35254	0.189852	0.389133
SLC30A1	0.0583333	0.289407	0.583493	0.43645	0.35008	0.17387	0.378682
SLC30A5	0.0248958	0.298753	0.582867	0.44081	0.316329	0.161824	0.372346
SLC11A2	0.0583333	0.23627	0.583755	0.410012	0.350211	0.147302	0.365528
XDH	0.125	0.165323	0.577269	0.371296	0.413634	0.145161	0.361215
SLC40A1	0.391667	0.402002	0.322917	0.362459	0.553125	0.396834	0.359875
BGLAP	0.213462	0.0567472	0.5796	0.318174	0.503262	0.135104	0.357352
ZCCHC2	0.336806	0.432936	0.321206	0.377071	0.497409	0.384871	0.353038
PTGER4	4.40556e-05	0.254166	0.578266	0.416216	0.289177	0.127105	0.352686
EPHX1	4.40556e-05	0.222607	0.591487	0.407047	0.295787	0.111326	0.351406
MSRB3	0.163415	0.0815594	0.578805	0.330182	0.452817	0.122487	0.350646
FILIP1L	0.336806	0.420209	0.321206	0.370708	0.497409	0.378507	0.349857
SLC39A6	0.0583333	0.0825388	0.576438	0.329488	0.346552	0.070436	0.323437
SLC39A7	0.00828148	0.110209	0.585015	0.347612	0.300789	0.0592451	0.32213
CALCA	0.352885	0.299064	0.316937	0.308	0.511353	0.325974	0.321455
ATP8B1	0.391667	0.209515	0.316821	0.263168	0.550077	0.300591	0.308706
UGT1A4	0.00832554	0	0.596163	0.298082	0.306407	0.00416277	0.300163
UGT1A1	4.40556e-05	0	0.596163	0.298082	0.298126	2.20278e-05	0.298093
AVPR1A	0.391667	0.155893	0.316821	0.236357	0.550077	0.27378	0.295301
PAPLN	0.344344	0.186233	0.321206	0.253719	0.504947	0.265288	0.293247
RNASE3	0.336806	0.165221	0.334937	0.250079	0.504274	0.251013	0.292975
NPC1	4.40556e-05	0.500388	0.332205	0.416296	0.166146	0.250216	0.29121
UGT1A7	4.40556e-05	0	0.578594	0.289297	0.289341	2.20278e-05	0.289308
RNF149	0.336806	0.176183	0.321206	0.248695	0.497409	0.256494	0.28885
GHRHR	0.414706	0.112886	0.311472	0.212179	0.570442	0.263796	0.287634
KCNH3	0.1775	0.347158	0.306666	0.326912	0.330833	0.262329	0.284497
CRYL1	0.391667	0.107352	0.316821	0.212087	0.550077	0.249509	0.283165
CA1	0.00777778	0.479435	0.321442	0.400438	0.168499	0.243606	0.282524
FAM106A	0.414706	0.087729	0.311472	0.1996	0.570442	0.251217	0.281344
LGR5	0.391667	0.0841838	0.316821	0.200503	0.550077	0.237925	0.277373
ENTPD1	0.336806	0.126751	0.321206	0.223978	0.497409	0.231778	0.276492
FGF23	0.414706	0.0658709	0.311472	0.188671	0.570442	0.240288	0.27588
CLCN4	0.336806	0.114536	0.321206	0.217871	0.497409	0.225671	0.273438
CST1	0.414706	0.0292998	0.311472	0.170386	0.570442	0.222003	0.266737
CDCP2	0.336806	0.0739716	0.321206	0.197589	0.497409	0.205389	0.263297
KCNH1	0.1775	0.250216	0.306666	0.278441	0.330833	0.213858	0.260262
ELOVL6	0.336806	0.0541964	0.321206	0.187701	0.497409	0.195501	0.258354
OMP	0.336806	0.000425761	0.334937	0.167681	0.504274	0.168616	0.251776
HRH3	0.15	0.209095	0.319549	0.264322	0.309774	0.179548	0.249548
IBSP	0.213462	0.160501	0.311725	0.236113	0.369324	0.186981	0.249353
KCNA10	0.1775	0.182443	0.306666	0.244554	0.330833	0.179972	0.243319
CLEC4A	0.163415	0.163433	0.320946	0.24219	0.323888	0.163424	0.242185
MSRA	0.163415	0.16301	0.320946	0.241978	0.323888	0.163212	0.242079
MT2A	0.163415	0.112743	0.320946	0.216845	0.323888	0.138079	0.229512
HNMT	4.40556e-05	0.228534	0.332205	0.280369	0.166146	0.114289	0.223247
MTF1	0.0583333	0.174586	0.325232	0.249909	0.22095	0.11646	0.220846
AOC1	0.0248958	0.208031	0.322917	0.265474	0.186354	0.116463	0.21969
SLC2A3	0.0583333	0.15204	0.316821	0.234431	0.216744	0.105187	0.211004
FREM1	0.000304333	0.210412	0.316501	0.263457	0.158555	0.105358	0.21093
SPAG11A	0.213462	0	0.311472	0.155736	0.369197	0.106731	0.209101
CD1B	0.15	0.0206516	0.319549	0.1701	0.309774	0.0853258	0.202437
CLDN17	0.000304333	0.125676	0.316501	0.221089	0.158555	0.0629904	0.189746
ENPP7	0.0583333	0.0496111	0.325232	0.187422	0.22095	0.0539722	0.189602
SLC51A	0.0583333	0.0201759	0.316821	0.168499	0.216744	0.0392546	0.178038
CWC22	0.0248958	0.0107065	0.322917	0.166812	0.186354	0.0178011	0.170359
CA3	4.40556e-05	0.0169202	0.332205	0.174563	0.166146	0.00848214	0.170343
ALDH1A3	4.40556e-05	0.00361225	0.332205	0.167909	0.166146	0.00182815	0.167016
CYP4B1	0.00274	0.0365315	0.311686	0.174109	0.158583	0.0196357	0.165661

## Sheet: Top ranked genes
Non-redundant set of top 25 genes in each weighting scenario
ADM
AKR1C1
AKT1
APP
AR
ARC
ATP6
ATP8
CAMK2A
CASP3
CASP8
CASP9
CCL2
CD86
CDK2
CDKN1A
CDKN2A
CRP
CSF3
CTNNB1
CXCL1
CXCL2
CXCL8
CYP1A2
CYP2E1
EDN1
EGFR
EGR1
ESR1
FN1
FOS
FOSL1
GRIA1
GRIA2
HDAC1
HMOX1
HNRNPA1
HRAS
HSPA1A
HSPA5
HSPA8
HSPB1
ICAM1
IER3
IL6
JUN
KRAS
MAP3K8
MAPK1
MAPK8
MDM2
MYC
NCF1
NOS2
NR4A1
PARP1
PSME4
PTGER2
PTGIS
PTX3
RARRES2
RB1
RELA
RP9P
SEC14L3
SLC38A2
SNAI1
SNCA
SOD1
SRC
TLR4
TNFRSF1A
TOP2A
TP53
VCAM1
